# Supplementary material for: Association between QTc prolongation and mortality in patients with suspected poisoning in the emergency department: a transnational propensity score matched cohort study
Source: PubMed Central journal article supplement — BMJ Open. 2018 Jul 7;8(7):e020036. doi: 10.1136/bmjopen-2017-020036 (PMC6042584; doi:10.1136/bmjopen-2017-020036), 2018-07-07
Supplement: bmjopen-2017-020036.draft_revisions.pdf [file bmjopen-2017-020036.draft_revisions.pdf]

# BMJ Open

BMJ Open is committed to open peer review. As part of this commitment we make the peer review history of every article we publish publicly available.

When an article is published we post the peer reviewers' comments and the authors' responses online. We also post the versions of the paper that were used during peer review. These are the versions that the peer review comments apply to.

The versions of the paper that follow are the versions that were submitted during the peer review process. They are not the versions of record or the final published versions. They should not be cited or distributed as the published version of this manuscript.

BMJ Open is an open access journal and the full, final, typeset and author-corrected version of record of the manuscript is available on our site with no access controls, subscription charges or pay-per-view fees (<http://bmjopen.bmj.com>).

If you have any questions on BMJ Open's open peer review process please email [info.bmjopen@bmj.com](mailto:info.bmjopen@bmj.com)

# BMJ Open

## QTc prolongation and prognosis in patients with suspected poisoning in the emergency department – a transnational propensity score matched cohort

|                                 |                                                                                                                                                                                                                                                                                                                                                                                                                                                                                                                                                                            |
|---------------------------------|----------------------------------------------------------------------------------------------------------------------------------------------------------------------------------------------------------------------------------------------------------------------------------------------------------------------------------------------------------------------------------------------------------------------------------------------------------------------------------------------------------------------------------------------------------------------------|
| Journal:                        | <i>BMJ Open</i>                                                                                                                                                                                                                                                                                                                                                                                                                                                                                                                                                            |
| Manuscript ID                   | bmjopen-2017-020036                                                                                                                                                                                                                                                                                                                                                                                                                                                                                                                                                        |
| Article Type:                   | Research                                                                                                                                                                                                                                                                                                                                                                                                                                                                                                                                                                   |
| Date Submitted by the Author:   | 21-Oct-2017                                                                                                                                                                                                                                                                                                                                                                                                                                                                                                                                                                |
| Complete List of Authors:       | Schade Hansen, Camilla; Department of Emergency medicine<br>Pottegard, Anton; University of Southern Denmark, Clinical Pharmacology, Institute of Public Health<br>Ekelund, U; Lunds Universitet,<br>Kildegaard Jensen, Helene; Odense Universitetshospital, Department of Emergency Medicine<br>Lundager Forberg, Jakob; Helsingborgs lasarett, Department of Emergency Medicine and Prehospital Care<br>Brabrand, Mikkel; Odense University Hospital, Department of Emergency Medicine<br>Lassen, Annmarie; Odense University Hospital, Department of Emergency Medicine |
| <b>Primary Subject Heading</b>: | Emergency medicine                                                                                                                                                                                                                                                                                                                                                                                                                                                                                                                                                         |
| Secondary Subject Heading:      | Epidemiology, Cardiovascular medicine                                                                                                                                                                                                                                                                                                                                                                                                                                                                                                                                      |
| Keywords:                       | EPIDEMIOLOGY, CARDIOLOGY, TOXICOLOGY                                                                                                                                                                                                                                                                                                                                                                                                                                                                                                                                       |
|                                 |                                                                                                                                                                                                                                                                                                                                                                                                                                                                                                                                                                            |

SCHOLARONE™  
Manuscripts

# QTc prolongation and prognosis in patients with suspected poisoning in the emergency department – a transnational propensity score matched cohort

Camilla Schade Hansen MD<sup>1\*</sup>, Anton Pottegård MScPharm PhD<sup>2</sup>, Ulf Ekelund MD, PhD<sup>3</sup>, Helene Kildegaard Jensen MD<sup>1</sup>, Jakob Lundager Forberg MD PhD<sup>4</sup>, Mikkel Brabrand MD, PhD<sup>1,5</sup>, Annmarie Touborg Lassen MD, DMSci<sup>1</sup>

1. Department of Emergency Medicine, Odense University Hospital, Odense, Denmark
2. Clinical Pharmacology and Pharmacy, Department of Public Health, University of Southern Denmark, Odense, Denmark
3. Department of Emergency Medicine, Skåne University Hospital, Lund, Sweden
4. Department of Emergency Medicine, Helsingborg Hospital, Helsingborg, Sweden
5. Department of Emergency Medicine, Hospital of South West Jutland, Esbjerg, Denmark

Word count text: 2806

\*Correspondence to:

camilla.schade.hansen@rsyd.dk

Telephone: + 45 28155105

Sdr. Boulevard 29

5000 Odense C

Denmark

## ABSTRACT

**OBJECTIVES:** Poisoning is a frequent cause of admission to the emergency department (ED), and may involve drugs known to prolong the QT interval. The aims of this study were to describe the prevalence of QTc prolongation among ED patients with suspected poisoning and to calculate the absolute and relative risk of mortality or cardiac arrest associated with a prolonged QTc interval.

**METHODS:** We performed a register-based cohort study, including all adult first time contacts with suspected poisoning to the ED of two Swedish hospitals (January 2010 to December 2014) and two Danish hospitals (March 2013 to April 2014). We used propensity score matching to calculate hazard ratios (HR) for all-cause mortality or cardiac arrest (combined endpoint) within 30 days after contact comparing patients with a prolonged QTc interval ( $\geq 450$  ms men,  $\geq 460$  ms women) with patients with a QTc interval of  $< 440$  ms.

**RESULTS:** Among all first-time contacts with suspected poisoning that had an ECG recorded within four hours after arrival ( $n = 3869$ ), QTc prolongation occurred in 6.5%. The overall mortality after a 30-day follow-up period was 0.8% (95% CI, 0.6-1.2), with an absolute risk of mortality or cardiac arrest in patients with QTc prolongation of 3.2% (95% CI, 1.4-6.1). A prolonged QTc interval on arrival was associated with a HR of 3.6 (95% CI, 1.0-12.2).

**CONCLUSION:** In the ED, a prolonged QTc interval in patients arriving with suspected poisoning seems to be associated with a three-fold increased risk of 30-day all-cause mortality or cardiac arrest.

### Strengths and limitations of the study

Patients were included from four different hospitals – two Swedish and two Danish.

Propensity score matching was used to adjust for several confounders.

Subgroups analysis was not possible due to a small number of events.

The included ECGs were all automatic readouts and the length of the QT interval was not confirmed manually.

## INTRODUCTION

Poisoning is a frequent cause of admission to the emergency department (ED),<sup>1,2</sup> and involves a variety of different drugs and substances. A wide range of drugs have been linked to QTc prolongation,<sup>3</sup> which has been associated with all-cause-mortality, cardiovascular death, and sudden cardiac death.<sup>4-9</sup> As an increased risk of mortality has been documented in patients treated with potential QTc prolonging drugs,<sup>10-13</sup> one may hypothesize that the risk is even higher among poisoned patients. Therefore, cardiac monitoring is recommended in patients poisoned by potentially proarrhythmic agents and drugs that can lead to torsades de pointes.<sup>14</sup>

Only few studies have investigated the relationship between QTc prolongation and adverse outcomes in a population of undifferentiated poisoned patients.<sup>15,16</sup> The absolute and relative risk of mortality and cardiac arrest associated to QTc prolongation in poisoned patients remains unknown. Therefore, we aimed to: (1) describe the prevalence of QTc prolongation found among patients with suspected poisoning in the emergency department; (2) to investigate if QTc prolongation is associated with an increased risk of mortality or cardiac arrest within 30 days after arrival to the emergency department.

## MATERIALS AND METHODS

### Study design and setting

This is a register-based cohort study. The study is based on ED data from January 1 2010 to December 31 2014 from two Swedish hospitals (Skåne University Hospital, Lund and Helsingborg Hospital) and from two Danish hospitals (Odense University Hospital and the Hospital of South West Jutland, Esbjerg) from March 1 2013 to April 30 2014. In both Denmark and Sweden, the healthcare systems are tax-funded and all residents have free access to healthcare. The University

1  
2  
3  
4 Hospital Skåne has a contingency population of approximately 310,000, whereas Odense  
5 University Hospital covers a population of 290,000 people. The two regional hospitals have a  
6 contingency population of 250,000 people (Helsingborg), and 220,000 people (Esbjerg).  
7  
8  
9

### 10 **Selection of participants**

11 We identified all adults ( $\geq 18$  years), who arrived to the EDs with suspected poisoning. The contacts  
12 were eligible for the main analysis if they had a 12-lead ECG recorded within 4 hours after arrival.  
13  
14 A missing QTc interval on the recorded ECG, or a QRS duration of  $\geq 120$  ms were both reasons for  
15 exclusion. Patients with multiple contacts were included only at their first contact with suspected  
16 poisoning within the study period. Information regarding identification of patients with suspected  
17 poisoning is outlined in Appendix A.  
18  
19  
20  
21  
22  
23

### 24 **Data sources**

25 In both Denmark and Sweden, all residents have a unique personal civil registration number,  
26 which allows cross-linkage at personal level between databases. We extracted data from several  
27 registries: The logistic systems in the ED at the Region of Southern Denmark<sup>17</sup> and Region of  
28 Skåne, the electronic central ECG databases at Region of Southern Denmark and Region of Skåne,  
29 the Danish National Patient Registry<sup>18</sup> and Region of Skåne Health care databases, the Danish  
30 National Prescription Registry,<sup>19</sup> the Swedish Pharmacy Registry,<sup>20</sup> and finally The Danish Civil  
31 Registration System<sup>21</sup> and the Swedish Population Register.<sup>22</sup> Further information regarding the  
32 data sources is provided in Appendix A.  
33  
34  
35  
36  
37  
38  
39  
40

### 41 **ECG measurements and definitions**

42 The QT interval was measured at the first ECG recorded after contact to the ED. All the QT  
43 intervals were calculated automatically as a median value and stored in either MUSE Cardiology  
44 Information System (GE Healthcare) or Philips Diagnostic ECG. The GE Marquette 12SL ECG  
45 Analysis Program provided QTc intervals for ECGs recoded in MUSE.<sup>23</sup> ECGs recorded by Phillips  
46 were analyzed by the DXL-algorithm.<sup>24</sup> Only QT intervals corrected for heart rate (QTc) was used in  
47 our analysis. For correction, we chose the Framingham Formula ( $QT_{cFramingham} = QT + 0.154 (1 -$   
48  $RR)$ ).<sup>25</sup> Additional details about ECG measurements are outlined in Appendix B.  
49  
50  
51  
52  
53  
54  
55  
56  
57  
58  
59  
60

## Exposure and outcome

Our primary outcome was a combined endpoint of all-cause mortality or cardiac arrest (defined in Appendix C.1) within 30 days from the day of arrival to the ED. Patients who died in relation to cardiac arrest were classified as dead rather than cardiac arrests. The primary exposure was QTc prolongation, defined as a QTc of  $\geq 450$  ms for men and  $\geq 460$  ms for women.<sup>26</sup> Patients with a normal QTc length were defined as having a QTc interval of  $< 450$  ms (men) or  $< 460$  ms (women).

## Analysis

The prevalence of QTc prolongation overall, and in relation to specific groups of poisoning was described in a cross-sectional description. In this description, we identified all patients with a discharge diagnosis of poisoning (International Classification of Diseases (ICD-10) codes T36\*-T65\*, F100\*, F110\*, F120\*, F130\*, F140\*, F150\*, F160\*, F170\*, F180\* or F190\* as a primary or secondary diagnosis). All patients, who had a discharge diagnosis of poisoning, were subdivided into five poisoning groups: 1. Analgesics and drugs of abuse, 2. Psychotropic drugs including drugs affecting the central nervous system, 3. Organic and chemical substances, non-medical, 4. Others, and 5. Multidrug (see Appendix C.2).

The association between QTc prolongation and all-cause mortality and cardiac arrest was evaluated using propensity score matching.<sup>27,28</sup> We calculated a propensity score for all included patients by use of logistic regression with QTc  $\geq 450$  ms (men) or  $\geq 460$  ms (women) as the outcome (binary outcome). Patients with a QTc interval between 440-449 ms (men) and 440-459 ms (women) were excluded in the model to avoid near-overlapping ranges. The following possible confounders were included in the propensity score model: sex, age, comorbidity (measured as Charlson Comorbidity Index<sup>29,30</sup>), history of myocardial infarction or congestive heart failure (Appendix C3. and C.4), prescription of QT prolonging drugs within 90 days (defined in Appendix C.5), heart rate, and study center. We performed a 1:2 parallel balanced nearest neighbor matching without replacement and with a caliper of 0.05.<sup>31</sup> In the matched cohorts, 30-day mortality was modelled using Cox regression.

## Statistics

The absolute risk of event in patients with suspected poisoning was calculated overall, for those with QTc prolongation and for those without QTc prolongation. In the propensity score matched cohort, the risk associated with QTc prolongation was estimated as hazard ratios (HR). We estimated 95% confidence intervals based on a binominal distribution. To illustrate the impact of QTc prolongation on 30-days all-cause mortality or cardiac arrest we generated a Kaplan Meier failure curve.

In a sensitivity analysis, we restricted the material to individuals who were both suspected of being poisoned on arrival and received a discharge diagnose of poisoning. The prevalence of QTc prolongation and the propensity score analyses were repeated using the Bazett formula for QT correction.<sup>32</sup>

Statistical analyses were performed using STATA version 14 (StataCorp LP, College Station, Texas).

The study was approved by the Danish Data Protection Agency (No. 2008-58-0035, Journal nr. 15/21632) and The Danish Health Authority (No. 3-3013-1031). In consistency with Swedish law the study was approved by the Regional Ethics Committee in Lund and by Region Skåne.

## RESULTS

### Characteristics of the study cohort

At the four hospitals, we identified a total of 6838 ED contacts with suspected poisoning. After exclusion of those aged <18 years (n=22), an ECG not recorded in an acceptable time-interval (n=1411), multiple contacts within the study period (n=1412), a missing QT interval (n=1), or QRS duration  $\geq 120$  ms (n=123) the final cohort comprised 3869 patients with suspected poisoning (48.0% men, median age 38) (Figure 1). Of these, 69.2% (n=2676) had a discharge diagnose of poisoning.

Patients with a prolonged QTc interval were older, had more comorbidity, and more commonly had a history of heart disease than those without QTc prolongation (Table 1).

|  | All* | Before propensity score matching |                                                               | After propensity score matching |                                                               |
|--|------|----------------------------------|---------------------------------------------------------------|---------------------------------|---------------------------------------------------------------|
|  |      | QTc<br><440 ms (men and women)   | Prolonged QTc<br>$\geq 450$ ms (men)<br>$\geq 460$ ms (women) | QTc<br><440 ms (men and women)  | Prolonged QTc<br>$\geq 450$ ms (men)<br>$\geq 460$ ms (women) |
|  |      |                                  |                                                               |                                 |                                                               |



| N                                                                    | 3869        | 3296        | 253        | 496        | 248        |
|----------------------------------------------------------------------|-------------|-------------|------------|------------|------------|
| <b>Sex</b>                                                           |             |             |            |            |            |
| Male (%)                                                             | 1859 (48.0) | 1634 (49.6) | 121 (47.8) | 229 (46.2) | 119 (48.0) |
| <b>Age (median, IQR)</b>                                             | 38 (25-53)  | 36 (24-51)  | 52 (36-68) | 53 (37-69) | 51 (35-66) |
| 18-50 – n (%)                                                        | 2747 (71.0) | 2444 (74.2) | 119 (47.0) | 236 (48.0) | 119 (48.0) |
| 51-69 – n (%)                                                        | 788 (20.4)  | 611 (18.5)  | 77 (30.4)  | 140 (28.5) | 77 (31.0)  |
| ≥70 – n (%)                                                          | 334 (8.6)   | 241 (7.3)   | 57 (22.5)  | 116 (23.6) | 52 (21.0)  |
| <b>Charlson Comorbidity Index – n (%)</b>                            |             |             |            |            |            |
| CCI = 0                                                              | 2747 (71.0) | 2395 (72.7) | 140 (55.3) | 263 (53.0) | 140 (56.5) |
| CCI = 1                                                              | 718 (18.6)  | 587 (17.8)  | 60 (23.7)  | 133 (26.8) | 58 (23.4)  |
| CCI ≥ 2                                                              | 404 (10.4)  | 314 (9.5)   | 53 (20.9)  | 100 (20.2) | 50 (20.2)  |
| <b>Myocardial infarction or congestive heart failure – n (%)</b>     | 185 (4.8)   | 136 (4.1)   | 32 (12.6)  | 55 (11.1)  | 29 (11.7)  |
| <b>QT-prolonging drugs – n (%)</b>                                   | 1518 (39.2) | 1248 (37.9) | 110 (43.5) | 213 (42.9) | 109 (44.0) |
| <b>ECG measurements</b>                                              |             |             |            |            |            |
| Heart rate (median, IQR)                                             | 85 (73-99)  | 87 (74-101) | 76 (65-84) | 76 (65-87) | 76 (65-85) |
| QTc ≥500 ms - n (%)                                                  | 27 (0.7)    | -           | 27 (10.7)  | -          | 27 (10.9)  |
| <b>Any diagnose of poisoning – n (%)</b>                             | 2676 (69.2) | 2282 (69.2) | 153 (60.5) | 310 (62.5) | 151 (60.9) |
| <b>Group of poisoning – n (%)</b>                                    |             |             |            |            |            |
| 1. Analgesics and drugs of abuse                                     | 397 (14.8)  | 333 (14.6)  | 21 (13.7)  | 41 (13.2)  | 21 (13.9)  |
| 2. Psychotropic drugs and drugs affecting the central nervous system | 805 (30.1)  | 695 (30.5)  | 49 (32.0)  | 103 (33.2) | 49 (32.5)  |
| 3. Organic and chemical substances, non-medical                      | 502 (18.8)  | 437 (19.1)  | 24 (15.7)  | 50 (16.1)  | 24 (15.9)  |
| 4. Others                                                            | 470 (17.6)  | 392 (17.2)  | 30 (19.6)  | 54 (17.4)  | 29 (19.2)  |
| 5. Multidrug                                                         | 502 (18.8)  | 425 (18.6)  | 29 (19.0)  | 62 (20.0)  | 28 (18.5)  |
| <b>Clinics – n (%)</b>                                               |             |             |            |            |            |
| The University Hospital Skåne, Lund                                  | 1794 (46.4) | 1539 (46.7) | 125 (49.4) | 247 (49.8) | 124 (50.0) |
| Odense University Hospital                                           | 501 (12.9)  | 419 (12.7)  | 28 (11.1)  | 50 (10.1)  | 28 (11.3)  |
| Helsingborg Hospital                                                 | 1372 (35.5) | 1176 (35.7) | 81 (32.0)  | 170 (34.3) | 79 (31.9)  |
| Hospital of South West Jutland                                       | 202 (5.2)   | 162 (4.9)   | 19 (7.5)   | 29 (5.8)   | 17 (6.9)   |

Abbreviations: CCI, Charlson Comorbidity Index; IQR, interquartile range.

\*In the total cohort patients with a near-overlapping QTc interval (440-449 ms men, 440-459 ms women) are included (n =320).

In addition, prescription of QT prolonging drugs was more frequent in the group with a prolonged QTc interval. Among the included patients, 6.5% (95% CI, 5.9-7.4) had QTc prolongation, while the prevalence of severe QTc prolongation (≥500 ms) was 0.7% (95% CI, 0.5-1.0). The prevalence of QTc prolongation in relation to specific groups of poisoning varied within the range 4.8-6.2%, with the highest prevalence in the group categorized as “others” (6.2%; 95% CI, 4.8-8.7) (Table 2).

|                                         | Analgesics and drugs of abuse         | Psychotropic drugs including drugs affecting the central nervous system | Chemical and biological substances, non-medical | Others                | Multidrug                            |
|-----------------------------------------|---------------------------------------|-------------------------------------------------------------------------|-------------------------------------------------|-----------------------|--------------------------------------|
| ICD-10 codes or definition              | T39-T40, F110, F120, F140, F150, F160 | T42-T44, F130, F190                                                     | T51-T65, F100, F170, F180                       | T36-T38, T41, T45-T50 | ≥2 of the described poisoning groups |
| N                                       | 397                                   | 805                                                                     | 502                                             | 470                   | 502                                  |
| <b>QTc prolongation – n (%; CI 95%)</b> |                                       |                                                                         |                                                 |                       |                                      |
| ≥450 ms (men)                           | 21 (5.3%; 3.3-8.0)                    | 49 (6.1%; 4.5-8.0)                                                      | 24 (4.8%; 3.1-7.0)                              | 29 (6.2%; 4.2-8.7)    | 28 (5.6%; 3.7-8.0)                   |
| ≥460 ms (women)                         |                                       |                                                                         |                                                 |                       |                                      |

Abbreviation: CI, confidence interval.

## Prognosis

Overall, the 30-day risk of all-cause mortality or cardiac arrest was 0.8% (95% CI, 0.6-1.2, n=32). Among individuals with QTc prolongation (n= 253), death within 30 days after contact to the ED occurred in 7 patients, whereas one patient suffered from cardiac arrest. Among those with a normal QTc interval (n=3616), we found 24 events during the follow-up period. The absolute risk of event within 30 days was 3.2% (95% CI, 1.4-6.1) and 0.7% (95% CI, 0.5-1.0) for patients with and without QTc prolongation, respectively.

The propensity score analysis included 248 patients with a QTc of  $\geq 450$  ms (men) or  $\geq 460$  ms (women) matched with 496 patients with a QTc interval  $< 440$  ms. Acceptable balance of baseline variables was achieved (Table 1). QTc prolongation was associated with a HR of 3.6 (95% CI, 1.0-12.2) for 30-day all-cause mortality or cardiac arrest (Table 3 and Figure 2).

| Propensity score matched cohort                             |     |              |                 |
|-------------------------------------------------------------|-----|--------------|-----------------|
|                                                             | n   | Events (No.) | HR** (95% CI)   |
| <b>Suspected poisoning</b>                                  |     |              |                 |
| Normal QTc interval $< 440$ ms                              | 496 | n<5          | 1.0 (ref)       |
| QTc prolongation $\geq 450$ ms, men<br>$\geq 460$ ms, women | 248 | 8            | 3.6 (1.0-12.2)  |
| <b>Diagnose of poisoning*</b>                               |     |              |                 |
| Normal QTc interval $< 440$ ms                              | 310 | n<5          | 1.0 (ref)       |
| QTc prolongation $\geq 450$ ms, men<br>$\geq 460$ ms, women | 151 | 6            | 10.5 (1.2-90.0) |

Abbreviations: CI, confidence interval; HR, hazard ratio. If the number of events in the analysis was less than 5 (marked by n<5), the number of patients in the strata is not shown.

\*Patient who arrived with suspected poisoning and had a discharge diagnose of poisoning.

\*\*Cox regression calculated after 1:2 propensity score matching comparing patients with QTc prolongation to patients without QTc prolongation. In this population, patients with near-overlapping ranges of the QTc interval were excluded (QTc 440-449 ms, men and 440-459 ms, women).

## Subgroups and sensitivity analyses

Our results from the subgroup analysis are outlined in Appendix D. When restricting to those who also received a discharge diagnose of poisoning, we found an overall 30-day risk of 0.7% (95% CI, 0.4-1.1) and QTc prolongation yielded an overall HR of 10.5 (95% CI, 1.2-90.0). When we corrected

1  
2  
3  
4 the QT interval with the Bazett formula a total of 1112 patients had QTc prolongation (28.7%),  
5 which was associated with a HR of 1.0 (95% CI, 0.2-5.5).  
6  
7

## 8 9 **DISCUSSION**

10  
11 In this transnational cohort of patients with suspected poisoning arriving to the ED, QTc  
12 prolongation was common (6.5%). A prolonged QTc interval was associated with a three-fold  
13 increased risk of 30-day all-cause mortality or cardiac arrest and an absolute risk of 3.2%.  
14  
15

16  
17  
18 This study has several strengths. First, this was a multicenter cohort study with data from two  
19 Swedish and two Danish EDs which ensured a broad representability. Use of personal  
20 identification numbers in all contacts to the hospital system in Sweden and Denmark provide the  
21 possibility to follow individual patients in and out of hospital and loss of follow-up or unmeasured  
22 registration of death did not occur.<sup>17-22</sup> In addition, we implemented several confounders in our  
23 propensity score model, and thus managed to control for these despite a low event-rate. We  
24 included patients who were suspected for being poisoned on arrival to the ED. These patients do –  
25 in contrast to patients identified by their discharge diagnosis – represent the clinical situation at  
26 the door in the ED. At this point, the doctors have to decide whether or not to observe the  
27 patients using telemetry.  
28  
29  
30  
31  
32  
33  
34  
35

36  
37 This study also has several limitations. First of all, the design was an observational design. The ECG  
38 measures were all automatic readouts, and we did not manually validate the length of the QT  
39 intervals. However, this method has been validated in a previous Danish study using the same  
40 technique, which showed a good overall agreement between manual QTc interval and the digital  
41 record of the QTc interval with a mean difference of 1.3 ms.<sup>8</sup> Further, we did not exclude ECGs  
42 with diagnoses complicating QTc measuring, e.g. atrial fibrillation. We did not have information  
43 regarding previous ECGs, and we do not know if some patients had a previous ECG with QTc  
44 prolongation before arrival with suspected poisoning. The dose of drug or substance was  
45 unknown, and we were ignorant of the timing of the ECG recording in relation to peak drug  
46 concentration. The poisonings were not confirmed by blood samples or by urine tests, but were  
47 extracted from predefined ICD-10 codes.  
48  
49  
50  
51  
52  
53  
54  
55  
56  
57

1  
2  
3  
4 The small number of events was a limitation in its own and did not allow for meaningful subgroup  
5 analysis. As cardiac arrest was identified based on hospital registration an eventually event of  
6 unregistered cardiac arrest, where the patient survived, is not included as an event. The number  
7 of these events is believed to be small as registration of cardiac arrest is mandatory in both the  
8 Swedish and Danish health care system. With a small number of events any miscounting of events  
9 would lead to considerable change in risk estimates. If we have overlooked one event of cardiac  
10 arrest who survived in the group of patients with QTc prolongation it would increase the absolute  
11 risk from 3.2% to 3.6%, while the risk of event in the entire study population would increase from  
12 0.8% to 0.9%.

13  
14  
15  
16  
17  
18  
19  
20  
21 The event-rate in our cohort (0.8%) is in accordance with previous studies of poisoned patients  
22 (0.5-1.2%).<sup>16,33,34</sup> In contrast, the prevalence of QTc prolongation is substantially lower (6.5%) than  
23 in a previous study of unselected ED patients (35%).<sup>35</sup> This is probably due to the choice of QT  
24 correcting formula. If the Bazett formula had been chosen for main analysis, the prevalence of QTc  
25 prolongation in our study population would have been 28,7%. It is of broad consensus that the  
26 more widely used Bazett formula tends to overcorrect at heart rates at 80-90 beats per minute  
27 and above resulting in a higher prevalence of QTc prolongation.<sup>32,36</sup> As a high percentage of acute  
28 patients have tachycardia at arrival, this probably explains most of the difference between the  
29 occurrence of QTc prolongation in our study and in the study of unselected ED patients. The  
30 Framingham formula used in our study is considered superior compared with the more widely  
31 used Bazett formula.<sup>36</sup>

32  
33  
34  
35  
36  
37  
38  
39  
40  
41  
42 The clinical impact of our findings is the difference in risk of all-cause mortality and cardiac arrest  
43 within 30 days in respect to QTc prolongation. We found an absolute risk of 0.7% in patients with  
44 suspected poisoning without QTc prolongation, whereas patients with a prolonged QTc interval  
45 have an absolute risk of 3.2%, which translates into a HR of 3.6 (95% CI, 1.0-12.2). In the general  
46 population, a meta-analysis reported a pooled relative risk of 1.35 (95% CI, 1.24-1.46) for long-  
47 term mortality in patients with QTc prolongation.<sup>7</sup> A recent study including all patients who had an  
48 ECG recorded at the hospital for any reason reported QTc prolongation to be associated with a HR  
49 of 7.3 (95% CI, 4.10-13.05) for 30-day mortality.<sup>36</sup> Combined, these studies support the hypothesis

1  
2  
3  
4 that patients with a prolonged QTc are at increased risk. Whether or not this is directly linked to  
5 the increased QTc interval or due to other risk factors associated with a prolonged QTc remains  
6 unknown.  
7

8  
9 As demonstrated in our cohort the prevalence of QTc prolongation is strongly associated to the  
10 correction formula. Further, the difference between the HR calculated in the main analysis using  
11 Framingham (HR 3.6; CI 95%, 1.0-12.2) versus the sensitivity analysis using Bazett (HR 1.0; 95% CI,  
12 0.2-5.5) is remarkable. We suspect that using the Bazett formula dilutes the association by  
13 including more patients at low risk as a result of overcorrection.  
14  
15  
16  
17

18  
19 Despite the use of a propensity score model adjusting for several covariates, we cannot exclude  
20 residual confounding. From a clinical point of view, this means that the patients with a prolonged  
21 QTc probably need special care and attention. However, the needed care is not necessarily limited  
22 to telemetry and increased cardiac awareness. Of note, a ventricular arrhythmia with fatal  
23 outcome caused by drug-induced QTc prolongation, would be expected to happen within a  
24 relatively short time-interval after exposure. This was not the case in our study with the first event  
25 occurring three days after contact (see Figure 2). In addition, a QTc interval threshold for  
26 identification of patients in need of cardiac telemetry is not well-established. Unfortunately, our  
27 cohort was too small to do further subdivisions of the QTc interval.  
28  
29  
30  
31  
32  
33

34  
35 Ventricular arrhythmias, especially torsades de pointes, are feared consequences of QT  
36 prolongation and may be the cause of death in some poisonings.<sup>37,38</sup> However, as torsades de  
37 pointes is a rare condition,<sup>37,38</sup> it is unlikely to have influenced our results.  
38  
39

40  
41 In this cohort of patients with suspected poisoning 69.2% received a discharge diagnose of  
42 poisoning. This is in contrast to results from a previous Danish study, which found an agreement of  
43 79% for suspected poisoning on arrival and a discharge diagnose of poisoning.<sup>17</sup> In our cohort, only  
44 those who had an ECG recorded were included, and several common poisonings, e.g. alcohol  
45 intoxication, are usually not followed by ECG recording.  
46  
47

48  
49 QTc prolongation was most frequent in the group of poisoning labeled "others" (Table 2). In this  
50 group, the ICD-10 code T50.9 for unspecified poisonings was given to the majority of the patients.  
51 These patients might have been too sick to tell about their poisoning or perhaps denied to do so.  
52 This reflects a common clinical problem in the ED, and indicates that a specific poisoning diagnosis  
53  
54  
55  
56  
57  
58  
59  
60

1  
2  
3  
4 can be difficult to establish. Further, lack of precision in coding procedure may contribute to  
5  
6  
7  
8  
9  
10  
11  
12  
13  
14  
15  
16  
17  
18  
19  
20  
21  
22  
23  
24  
25  
26  
27  
28  
29  
30  
31  
32  
33  
34  
35  
36  
37  
38  
39  
40  
41  
42  
43  
44  
45  
46  
47  
48  
49  
50  
51  
52  
53  
54  
55  
56  
57  
58  
59  
60

can be difficult to establish. Further, lack of precision in coding procedure may contribute to  
unspecific diagnoses.

In conclusion, we found QTc prolongation in a mixed population of patients with suspected  
poisoning in the emergency department of two Swedish and two Danish hospitals to be associated  
with a three-fold risk of 30-day all-cause mortality or cardiac arrest and an absolute risk of 3.2%.

### **Founding**

This study was funded by an independent grant from The Research Foundation of Odense  
University Hospital. The funding sources had no role in the design of the study, data analysis or  
interpretation of the results.

### **Competing interests**

ATL was supported by an unrestricted grant to the University of Southern Denmark from  
TrygFoundation. All other authors declare no conflicts of interest.

### **Author contributions**

CSH designed the study, interpreted the results and drafted the paper. AP analyzed the data. CSH,  
AP, ATL, HKJ, UE, MB, and JLF conceived the study. ATL, AP and HKJ provided statistical advice and  
advice on the study design. AP, ATL, HKJ, UE, MB, and JLF critically reviewed the paper, assisted  
with interpretation of the results, and have approved the final edition. CSH takes responsibility for  
the final paper.

### **Data sharing statement**

Due to Danish law regarding personal data we are not allowed to share data in public dataset.  
However, we welcome every researcher who wants to repeat the analysis or do new analysis in  
the dataset. Please contact professor Annmarie Lassen (Annmarie.Lassen@rsyd.dk) and she will  
help the researcher to get access to the data.

1  
2  
3  
4  
5  
6  
7  
8  
9  
10  
11  
12  
13  
14  
15  
16  
17  
18  
19  
20  
21  
22  
23  
24  
25  
26  
27  
28  
29  
30  
31  
32  
33  
34  
35  
36  
37  
38  
39  
40  
41  
42  
43  
44  
45  
46  
47  
48  
49  
50  
51  
52  
53  
54  
55  
56  
57  
58  
59  
60

For peer review only

## REFERENCES

1. Carter-Storch R, Olsen UF, Mogensen CB. Admissions to emergency department may be classified into specific complaint categories. *Dan Med J*. 2014;61(3):A4802.
2. Safwenberg U, Terént A, Lind L. Differences in Long-term Mortality for Different Emergency Department Presenting Complaints. *Acad Emerg Med*. 2008;15(1):9-16.
3. Woosley RL, Romero KA. QTdrugs List. AZCERT, Inc. <https://www.crediblemeds.org/new-drug-list/>. Updated August 10, 2016. Accessed December 17, 2015.
4. de Bruyne MC, Hoes AW, Kors JA, et al. Prolonged QT interval predicts cardiac and all-cause mortality in the elderly. The Rotterdam Study. *Eur Heart J*. 1999;20(4):278-284.
5. Straus SM, Kors JA, De Bruin ML, et al. Prolonged QTc interval and risk of sudden cardiac death in a population of older adults. *J Am Coll Cardiol*. 2006;47(2):362-367.
6. Robbins J, Nelson JC, Rautaharju PM, et al. The association between the length of the QT interval and mortality in the Cardiovascular Health Study. *Am J Med*. 2003;115(9):689-694.
7. Zhang Y, Post WS, Blasco-Colmenares E, et al. Electrocardiographic QT interval and mortality: a meta-analysis. *Epidemiology*. 2011;22(5):660-670.
8. Nielsen JB, Graff C, Rasmussen PV, et al. Risk prediction of cardiovascular death based on the QTc interval: evaluating age and gender differences in a large primary care population. *Eur Heart J*. 2014;35(20):1335-1344.
9. Panoulas VF, Toms TE, Douglas KM, et al. Prolonged QTc interval predicts all-cause mortality in patients with rheumatoid arthritis: an association driven by high inflammatory burden. *Rheumatology (Oxford)*. 2014;53(1):131-137.
10. Straus SM, Sturkenboom MC, Bleumink GS, et al. Non-cardiac QTc-prolonging drugs and the risk of sudden cardiac death. *Eur Heart J*. 2005;26(19):2007-2012.
11. Ray WA, Chung CP, Murray KT, et al. Atypical antipsychotic drugs and the risk of sudden cardiac death. *N Engl J Med*. 2009;360(3):225-235.
12. Ray WA, Meredith S, Thapa PB, et al. Cyclic antidepressants and the risk of sudden cardiac death. *Clin Pharmacol Ther*. 2004;75(3):234-241.
13. Ray WA, Murray KT, Hall K, et al. Azithromycin and the risk of cardiovascular death. *N Engl J Med*. 2012;366(20):1881-1890.
14. Drew BJ, Califf RM, Funk M, et al. Practice standards for electrocardiographic monitoring in hospital settings: an American Heart Association scientific statement from the Councils on Cardiovascular Nursing, Clinical Cardiology, and Cardiovascular Disease in the Young: endorsed by the International Society of Computerized Electrocardiology and the American Association of Critical-Care Nurses. *Circulation*. 2004;110(17):2721-2746.
15. Manini AF, Nelson LS, Skolnick AH, et al. Electrocardiographic predictors of adverse cardiovascular events in suspected poisoning. *J Med Toxicol*. 2010;6(2):106-115.
16. Manini AF, Hoffman RS, Stimmel B, et al. Clinical risk factors for in-hospital adverse cardiovascular events after acute drug overdose. *Acad Emerg Med*. 2015;22(5):499-507.
17. Norgaard B, Mogensen CB, Teglbjaerg LS, et al. Diagnostic packages can be assigned accurately in emergency departments. A multi-centre cohort study. *Dan Med J*. 2016;63(6):A5240.
18. Schmidt M, Schmidt SA, Sandegaard JL, et al. The Danish National Patient Registry: a review of content, data quality, and research potential. *Clin Epidemiol*. 2015;7:449-490.
19. Pottegard A, Schmidt SA, Wallach-Kildemoes H, et al. Data Resource Profile: The Danish National Prescription Registry. *Int J Epidemiol*. 2016.
20. Astrand B, Hovstadius B, Antonov K, et al. The Swedish National Pharmacy Register. *Stud Health Technol Inform*. 2007;129(Pt 1):345-349.
21. Schmidt M, Pedersen L, Sorensen HT. The Danish Civil Registration System as a tool in epidemiology. *Eur J Epidemiol*. 2014;29(8):541-549.



- 1  
2  
3  
4 22. Ludvigsson JF, Otterblad-Olausson P, Pettersson BU, et al. The Swedish personal identity number: possibilities and pitfalls in healthcare and medical research. *Eur J Epidemiol.* 2009;24(11):659-667.
- 5  
6 23. *Marquette™ 12SL™ ECG Analysis Program. Physician's Guide. 2056246-002 Revision B.* Milwaukee, WI: GE Healthcare; 13 July 2015.
- 7  
8 24. *Läkarhandbok för Phillips DXL-algoritm för EKG. Publikationsnummer 453564149891.* Andover, MA: Phillips Medical Systems; 1 June 2009.
- 9  
10 25. Sagie A, Larson MG, Goldberg RJ, et al. An improved method for adjusting the QT interval for heart rate (the Framingham Heart Study). *Am J Cardiol.* 1992;70(7):797-801.
- 11  
12 26. Rautaharju PM, Surawicz B, Gettes LS, et al. AHA/ACCF/HRS recommendations for the standardization and interpretation of the electrocardiogram: part IV: the ST segment, T and U waves, and the QT interval: a scientific statement from the American Heart Association Electrocardiography and Arrhythmias Committee, Council on Clinical Cardiology; the American College of Cardiology Foundation; and the Heart Rhythm Society: endorsed by the International Society for Computerized Electrocardiology. *Circulation.* 2009;119(10):e241-250.
- 13  
14  
15  
16  
17  
18 27. Sturmer T, Joshi M, Glynn RJ, et al. A review of the application of propensity score methods yielded increasing use, advantages in specific settings, but not substantially different estimates compared with conventional multivariable methods. *J Clin Epidemiol.* 2006;59(5):437-447.
- 19  
20  
21 28. Rassen JA, Shelat AA, Myers J, et al. One-to-many propensity score matching in cohort studies. *Pharmacoepidemiol Drug Saf.* 2012;21 Suppl 2:69-80.
- 22  
23 29. Charlson ME, Pompei P, Ales KL, et al. A new method of classifying prognostic comorbidity in longitudinal studies: development and validation. *J Chronic Dis.* 1987;40(5):373-383.
- 24  
25 30. Quan H, Sundararajan V, Halfon P, et al. Coding algorithms for defining comorbidities in ICD-9-CM and ICD-10 administrative data. *Med Care.* 2005;43(11):1130-1139.
- 26  
27 31. Austin PC. Optimal caliper widths for propensity-score matching when estimating differences in means and differences in proportions in observational studies. *Pharm Stat.* 2011;10(2):150-161.
- 28  
29 32. C. BH. An analysis of time-relations of electrocardiograms. *Heart.* 1920;7:353-370.
- 30  
31 33. Manini AF, Nelson LS, Stimmel B, et al. Incidence of adverse cardiovascular events in adults following drug overdose. *Acad Emerg Med.* 2012;19(7):843-849.
- 32  
33 34. Gunnell D, Ho D, Murray V. Medical management of deliberate drug overdose: a neglected area for suicide prevention? *Emerg Med J.* 2004;21(1):35-38.
- 34  
35 35. Seftchick MW, Adler PH, Hsieh M, et al. The prevalence and factors associated with QTc prolongation among emergency department patients. *Ann Emerg Med.* 2009;54(6):763-768.
- 36  
37 36. Vandenberg B, Vandael E, Robyns T, et al. Which QT Correction Formulae to Use for QT Monitoring? *Journal of the American Heart Association.* 2016;5(6):e003264.
- 38  
39 37. Al-Abri SA, Woodburn C, Olson KR, et al. Ventricular dysrhythmias associated with poisoning and drug overdose: a 10-year review of statewide poison control center data from California. *Am J Cardiovasc Drugs.* 2015;15(1):43-50.
- 40  
41  
42 38. Yap YG, Camm AJ. Drug induced QT prolongation and torsades de pointes. *Heart.* 2003;89(11):1363-1372.
- 43  
44  
45  
46  
47  
48  
49  
50  
51  
52  
53  
54  
55  
56  
57  
58  
59  
60

1  
2  
3  
4 **Legends for figures**  
5

6 **Figure 1: Flowchart of the study population**  
7

8 **Figure 2: Kaplan Meier failure estimate**  
9

10 Abbreviations: QTclong = 0, patients without QTc prolongation; QTclong = 1, patients with QTc prolongation.  
11  
12  
13  
14  
15  
16  
17  
18  
19  
20  
21  
22  
23  
24  
25  
26  
27  
28  
29  
30  
31  
32  
33  
34  
35  
36  
37  
38  
39  
40  
41  
42  
43  
44  
45  
46  
47  
48  
49  
50  
51  
52  
53  
54  
55  
56  
57  
58  
59  
60

For peer review only

1  
2  
3  
4  
5  
6  
7  
8  
9  
10  
11  
12  
13  
14  
15  
16  
17  
18  
19  
20  
21  
22  
23  
24  
25  
26  
27  
28  
29  
30  
31  
32  
33  
34  
35  
36  
37  
38  
39  
40  
41  
42  
43  
44  
45  
46  
47  
48  
49  
50  
51  
52  
53  
54  
55  
56  
57  
58  
59  
60

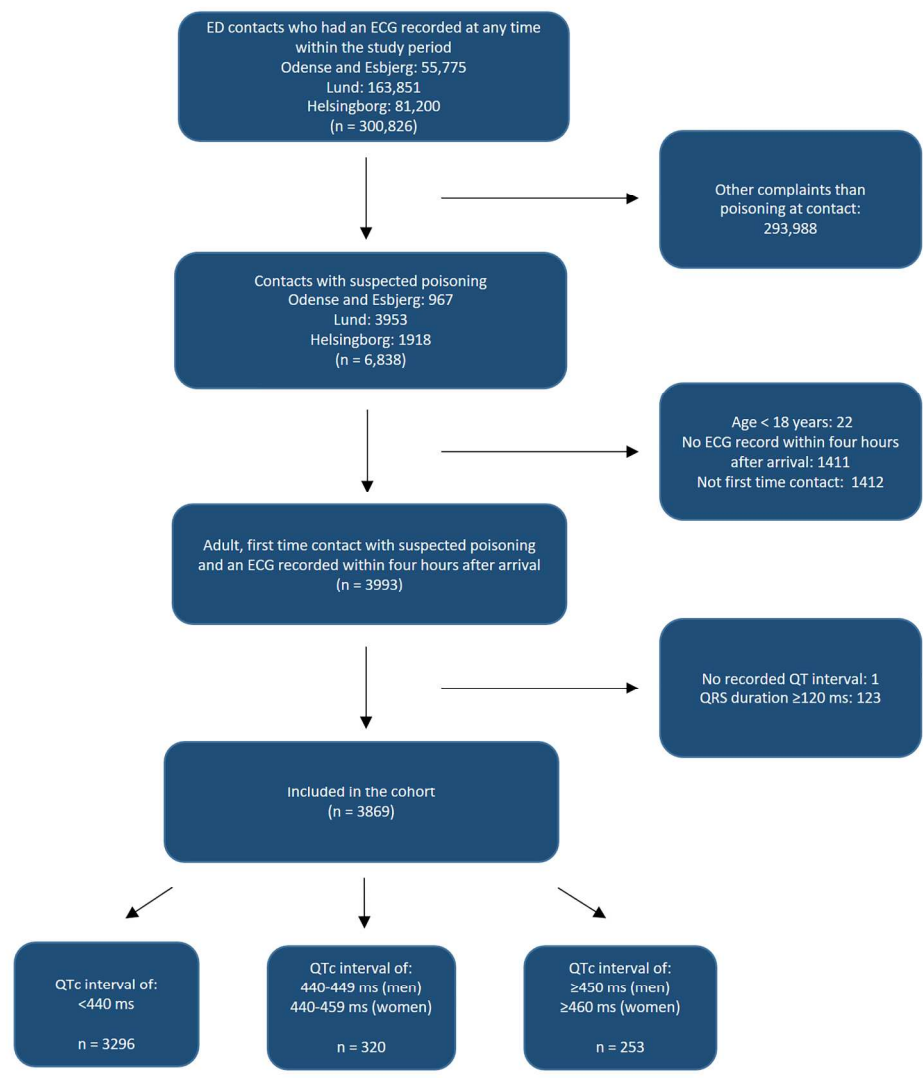

Figure 1: Flowchart of the study population  
203x220mm (300 x 300 DPI)

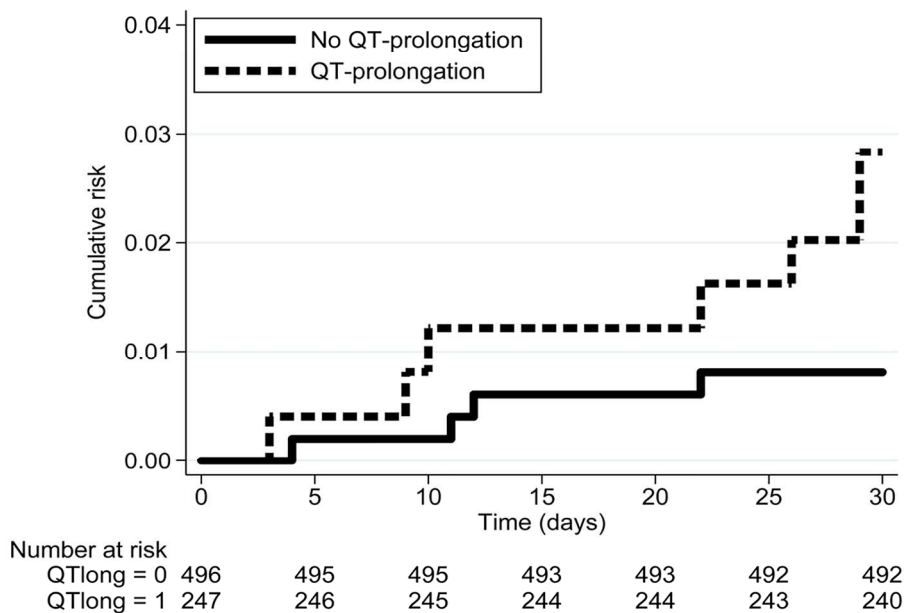

Figure 2: Kaplan Meier failure estimate  
 Abbreviations: QTlong = 0, patients without QTc prolongation; QTlong = 1, patients with QTc prolongation.

203x144mm (300 x 300 DPI)

## APPENDIX

### Appendix A – Data sources

In the logistic system in the EDs of the Region of Southern Denmark and the Region of Skåne information regarding triage and presumed diagnoses are shared among the health care personal. The system also provides information on time of arrival to the ED as well as time of discharge. At arrival all patients are registered by main reason for contact. Lund and Helsingborg have 43 somatic contact possibilities, Odense and Esbjerg have 40 contact possibilities. We used these systems to identify patients with suspected poisoning.

From the electronic central ECG databases at the Region of Southern Denmark and the Region of Skåne all ECGs measures were extracted. These databases contain information of all ECGs recorded in any hospital in the respective region.

The Danish National Patient Register was established in 1977. Since 1994 diagnostic information has been recorded in accordance with ICD-10. The content includes information regarding discharge diagnoses from which comorbidities were derived. In Sweden, all health care consultations are recorded in the respective region databases. From the Skåne Healthcare Register, we retrieved information corresponding to information from the Danish National Patient Register. In these regional databases diagnoses from both the primary and secondary health care system are available. Charlson Comorbidity Index was calculated based on data extracted for a 10 year-period ending on the day of contact in the Danish data. From the Swedish database, Charlson Comorbidity Index was calculated for a 2-year period ending on the day of contact to the ED.

The Swedish National Pharmacy Register contains data on all prescriptions dispensed at pharmacies since 2005. Besides date of dispensing, name, amount, and dose of the redeemed medication are accessible from this register. The Danish National Prescription Registry provides similar information of individual-level prescription of medication since 1995. Information of redeemed prescription of QT prolonging drugs (see Appendix c.5) within 90 days before contact was obtained through these registers.

1  
2  
3  
4 The Danish Civil Registration System contains data regarding birth, emigration, and vital status for  
5 the entire populations. Information regarding vital status in Sweden was retrieved from the  
6 Swedish population registry. The Danish Civil Registration System was established in 1968, and by  
7 law all Danish residents have a unique civil registration number of ten digits. Since 1967, all  
8 Swedish residences are assigned a ten-digit personal identity number. These unique numbers  
9 allow complete and accurate linkage between registries on an individual level.  
10  
11  
12  
13

## 14 **Appendix B – Supplementary methods**

### 15 *ECG measurements*

16  
17 All ECGs were recorded and stored either in MUSE® Cardiology Information System (GE  
18 Healthcare), or by Philips Diagnostic ECG (Philips). All ECGs in our analysis were 12 lead ECGs.  
19 ECGs recorded in MUSE were later processed using the Marquette 12SL algorithm, which calculate  
20 the QTc interval using the Bazett Formula, the Fridericia Formula, and the Framingham Formula. In  
21 MUSE, the QT interval is measured as a median value from the 12 leads. ECG recorded by Philips  
22 were analyzed by the DXL-algorithm. In this algorithm, the QT interval is measured as a median  
23 value from reliable leads. A lead is defined as reliable if little variation in beat-to-beat variation.  
24 Philips provided QTc intervals corrected by the Bazett Formula and the Fridericia Formula.  
25 To correct for heart rate, we chose the Framingham Formula ( $QT_{C_{Framingham}} = QT + 0.154 (1-RR)$ ).  
26 Because Philips DXL-algorithm does not routinely correct the QT interval using the Framingham  
27 Formula, we calculated the  $QT_{C_{Framingham}}$  ourselves. As we did not include RR intervals in our  
28 analysis, the formula was used in another edition than the original formula. Therefore, we used  
29 following formula for correction in ECGs recorded by Philips:  $QT_{C_{Framingham}} = QT + 154 (1-60/\text{heart}$   
30  $\text{rate})$ . The QRS duration was measured as a median value in both algorithms.  
31  
32  
33  
34  
35  
36  
37  
38  
39  
40  
41  
42  
43

44 The Marquette 12SL algorithm defines onsets as the earliest deflection in any lead, and offsets as  
45 the latest deflection in any lead. The QT interval is measured from the earliest detection of  
46 depolarization in any lead to the latest detection of repolarization in any lead. Similarly, the QRS  
47 duration was measured from the earliest onset in any lead to the latest deflection in any lead.  
48 The Philips DXL-algorithm first identifies waveform component and measures every beat in each  
49 lead individually. After the approximate waveform locations are known, onsets and offsets are  
50 defined. Once the onsets and offsets are known, duration of intervals are calculated.  
51  
52  
53  
54  
55  
56  
57  
58  
59  
60

1  
2  
3  
4  
5  
6 In both Denmark and Sweden ECG recording is performed by well-educated health care persons  
7 instructed only to accept ECGs of satisfying quality. Otherwise it is considered a routine to record  
8 another ECG. If multiple ECGs were recorded in a single individual, the first ECG recorded within 4  
9 hours after arrival was included in the analysis.  
10  
11  
12  
13  
14  
15  
16  
17  
18  
19  
20  
21  
22  
23  
24  
25  
26  
27  
28  
29  
30  
31  
32  
33  
34  
35  
36  
37  
38  
39  
40  
41  
42  
43  
44  
45  
46  
47  
48  
49  
50  
51  
52  
53  
54  
55  
56  
57  
58  
59  
60

## Appendix C – Codes and definitions

### C.1

| <b>Codes for cardiac arrest and codes used in identifying patients with cardiac arrest</b> |                                                                                                                                                                                                                                                                                                                                                     |
|--------------------------------------------------------------------------------------------|-----------------------------------------------------------------------------------------------------------------------------------------------------------------------------------------------------------------------------------------------------------------------------------------------------------------------------------------------------|
| ICD-10 codes                                                                               | DI46: Cardiac arrest<br>DI46.0: Cardiac arrest with successful recitation<br>DI46.1: Sudden cardiac death<br>DI46.9: Cardiac arrest unspecified                                                                                                                                                                                                     |
| SKS codes*                                                                                 | <b>Administrative codes</b><br>AVAA07: Sudden cardiac arrest<br>AVAA06: Sudden cardiac arrest<br><br><b>Procedure codes</b><br>ZZ0401: Standby for cardiac arrest<br><br><b>Treatment codes</b><br>BFFA6: Chest compressions<br>BFFA60: External chest compressions<br>BFFA60A: External chest compressions by use of mechanical chest compressions |
| KVÅ-codes**                                                                                | DF012: Chest compressions<br>DF017: Mechanical chest compressions<br>DF028: Cardiopulmonary resuscitation                                                                                                                                                                                                                                           |

\*SKS = Sundhedsvæsenets klassifikations system, available on <http://medinfo.dk/sks/brows.php>, Danish codes.

\*\*KVÅ= Klassifikation av vårdåtgärder, available on

<http://www.socialstyrelsen.se/klassificeringochkoder/atgardskoderkva>, Swedish codes.

### C.2

| <b>Poisoning divided into groups by use of ICD-10 codes</b>              |                                              |
|--------------------------------------------------------------------------|----------------------------------------------|
| <b>Analgesics and drugs of abuse</b>                                     | T39*-T40*, F110*, F120*, F140*, F150*, F160* |
| <b>Psychotropic drugs and drugs affecting the central nervous system</b> | T42*-T44*, F130*, F190*                      |
| <b>Organic and chemical substances, non-medical substances</b>           | T51*-T65*, F100*, F170*, F180*               |
| <b>Others</b>                                                            | T36*-T38*, T41*, T45*-T50*                   |
| <b>Multidrug</b>                                                         | ≥2 of the above mentioned poisoning groups   |



## C.3

| Charlson Comorbidity Index*            |                 |                                                                                                                                                                               |
|----------------------------------------|-----------------|-------------------------------------------------------------------------------------------------------------------------------------------------------------------------------|
| Condition                              | Assigned weight | ICD-10 codes                                                                                                                                                                  |
| Peripheral vascular disease            | 1               | I70.x, I71.x, I73.1, I73.8, I73.9, I77.1, I79.0, I79.2, K55.1, K55.8, K55.9, Z95.8, Z95.9                                                                                     |
| Cerebrovascular disease                | 1               | G45.x, G46.x, H34.0, I60.x-I69.x                                                                                                                                              |
| Dementia                               | 1               | F00.x-F03.x, F05.1, G30.x, G31.1                                                                                                                                              |
| Chronic pulmonary disease              | 1               | I27.8, I27.9, J40.x-J47.x, J60.x-J67.x, J68.4, J70.1, J70.3                                                                                                                   |
| Rheumatic disease                      | 1               | M05.x, M06.x, M31.5, M32.x-M34.x, M35.1, M35.3, M36.0                                                                                                                         |
| Peptic ulcer disease                   | 1               | K25.x-K28.x                                                                                                                                                                   |
| Mild liver disease                     | 1               | B18.x, K70.0-K70.3, K70.9, K71.3-K71.5, K71.7, K73.x, K74.x, K76.0, K76.2-K76.4, K76.8, K76.9, Z94.4                                                                          |
| Diabetes without chronic complications | 1               | E10.0, E10.1, E10.6, E10.8, E10.9, E11.0, E11.1, E11.6, E11.8, E11.9, E12.0, E12.1, E12.6, E12.8, E12.9, E13.0, E13.1, E13.6, E13.8, E13.9, E14.0, E14.1, E14.6, E14.8, E14.9 |
| Hemiplegia or paraplegia               | 2               | G04.1, G11.4, G80.1, G80.2, G81.x, G82.x, G83.0-G83.4, G83.9                                                                                                                  |
| Renal disease                          | 2               | I12.0, I13.1, N03.2-N03.7, N05.2- N05.7, N18.x, N19.x, N25.0, Z49.0- Z49.2, Z94.0, Z99.2                                                                                      |
| Diabetes with chronic complications    | 2               | E10.2-E10.5, E10.7, E11.2-E11.5, E11.7, E12.2-E12.5, E12.7, E13.2- E13.5, E13.7, E14.2-E14.5, E14.7                                                                           |
| Cancer                                 | 2               | C00.x-C26.x, C30.x-C34.x, C37.x- C41.x, C43.x, C45.x-C58.x, C60.x- C76.x, C81.x-C85.x, C88.x, C90.x-C97.x                                                                     |
| Metastatic cancer                      | 3               | C77.x-C80.x                                                                                                                                                                   |
| Moderate or severe liver disease       | 3               | I85.0, I85.9, I86.4, I98.2, K70.4, K71.1, K72.1, K72.9, K76.5, K76.6, K76.7                                                                                                   |
| AIDS/HIV**                             | 6               | B20.x-B22.x, B24.x                                                                                                                                                            |

\*Diagnostic codes for myocardial infarction and heart failure are not included in the index, but are included in this study as covariates.

\*\* AIDS = acquired immunodeficiency syndrome, HIV = human immunodeficiency virus

## C.4

| Variables from Charlson Comorbidity Index, included separately in the analysis |                                                                            |
|--------------------------------------------------------------------------------|----------------------------------------------------------------------------|
| Myocardial infarction                                                          | I21.x, I22.x, I25.2                                                        |
| Congestive heart failure                                                       | I09.9, I11.0, I13.0, I13.2, I25.5, I42.0, I42.5-I42.9, I43.x, I50.x, P29.0 |

## C.5

| List of drugs associated with QT prolongation and risk of TdP* |                                                                                                                                                                                                                                                          |
|----------------------------------------------------------------|----------------------------------------------------------------------------------------------------------------------------------------------------------------------------------------------------------------------------------------------------------|
| Drug category                                                  | ATC-codes**                                                                                                                                                                                                                                              |
| Alimentary tract and metabolism                                | Domperidone (A03FA03), Granisetron (A04AA02), Metoclopramide (A03FA01), Ondansetron (A04AA01), Pantoprazole (A02BC02)                                                                                                                                    |
| Cardiovascular system                                          | Amiodarone (C01BD01), Dronedarone (C01BD07), Flecainide (C01BC04), Furosemide (C03CA01, C03EB01), Hydrochlorothiazide (C03EA01, C09DA01, C09DA06, C09DA04, C09BA02), Indapamide (C03BA11), Isradipine (C08CA03), Ivabradine (C01EB17), Sotalol (C07AA07) |
| Genito urinary system and sex hormones                         | Alfuzosin (G04CA01), Mifepristone (G03XB01), Mirabegron (G04BD12), Solifenacin (G04BD08, G04CA53), Tolterodine (G04BD07), Vardenafil (G04BE09)                                                                                                           |

|                                                                        |                                                                                                                                                                                                                                                                                                                                                                                                                                                                                                                                                                                                                                                                                                                                                                                                                                                                                                                 |
|------------------------------------------------------------------------|-----------------------------------------------------------------------------------------------------------------------------------------------------------------------------------------------------------------------------------------------------------------------------------------------------------------------------------------------------------------------------------------------------------------------------------------------------------------------------------------------------------------------------------------------------------------------------------------------------------------------------------------------------------------------------------------------------------------------------------------------------------------------------------------------------------------------------------------------------------------------------------------------------------------|
| <b>Systemic hormonal preparations, excl. sex hormones and insulins</b> | Oxytocin (H01BB02), Pasireotide (H01CB05)                                                                                                                                                                                                                                                                                                                                                                                                                                                                                                                                                                                                                                                                                                                                                                                                                                                                       |
| <b>Anti-infectives for systemic use</b>                                | Atazanavir (J05AR15), Azithromycin (J01FA10), Bedaquiline (J04AK05), Ciprofloxacin (J01MA02), Clarithromycin (J01FA09), Erythromycin (J01FA01), Fluconazole (J02AC01), Fosfarnet (J05AD), Itraconazole (J02AC02), Ketoconazole (J02AB02), Metronidazole (J01XD01), Moxifloxacin (J01MA14), Posaconazole (J02AC04), Rilpivirine (J05AG05), Ritonavir (J05AE03), Roxithromycin (J01FA06), Saquinavir (J05AE01), Voriconazole (J02AC03)                                                                                                                                                                                                                                                                                                                                                                                                                                                                            |
| <b>Antineoplastic and immunomodulatory agents</b>                      | Anagrelide (L01XX35), Bortezomib (L01XX32), Bosutinib (L01XE14), Ceritinib (L01XE28), Crizotinib (L01XE16), Dabrafenib (L01XE23), Dasatinib (L01XE06), Degarelix (L02BX02), Eribulin mesylate (L01XX41), Fingolimod (L04AA27), Lapatinib (L01XE07), Leuprolide (L02AE02), Nilotinib (L01XE08), Oxaliplatin (L01XA03), Panobinostat (L01XX42), Pazopanib (L01XE11), Sorafenib (L01XE05), Sunitinib (L01XE04), Tacrolimus (L04AD02), Tamoxifen (L02BA01), Vandetanib (L01XE12), Vemurafenib (L01XE15)                                                                                                                                                                                                                                                                                                                                                                                                             |
| <b>Musculo-skeletal system</b>                                         | Tizanidine (M03BX02)                                                                                                                                                                                                                                                                                                                                                                                                                                                                                                                                                                                                                                                                                                                                                                                                                                                                                            |
| <b>Nervous system</b>                                                  | Amantadine (N04BB01), Amisulpride (N05AL05), Amitriptyline (N06AA09), Apomorphine (N04BC07), Aripiprazole (N05AX12), Asenapine (N05AH05), Atomoxetine (N06BA09), Citalopram (N06AB04), Clomipramine (N06AA04), Clozapine (N05AH02), Dexmedetomidin (N05CM18), Doxepin (N06AA12), Droperidol (N05AD08), Escitalopram (N06AB10), Fluoxetine (N06AB03), Galantamine (N06DA04), Haloperidol (N05AD01), Hydroxyzine (N05BB01), Imipramine (N06AA02), Levomepromazine (N05AA02), Lithium (N05AN01), Methadone (N07BC02), Mirtazapine (N06AX11), Nortriptyline (N06AA10), Olanzapine (N05AH03), Paliperidone (N05AX13), Paroxetine (N06AB05), Pimozide (N05AG02), Pipamperone (N05AD05), Propofol (N01AX10), Quetiapine (N05H04), Risperidone (N05AX08), Sertindole (N05AE03), Sertraline (N06AB06), Sevoflurane (N01AB08), Sulpiride (N05AL01), Tetrabenazine (N07XX06), Venlafaxine (N06AX16), Ziprasidone (N05AE04) |
| <b>Antiparasitic products, insecticides and repellents</b>             | Chloroquine (P01BC02), Hydroxychloroquine (P01BA02), Metronidazole (P01AB01), Pentamidine (P01CX01), Quinine sulfate (P01BC01)                                                                                                                                                                                                                                                                                                                                                                                                                                                                                                                                                                                                                                                                                                                                                                                  |
| <b>Respiratory system</b>                                              | Diphenhydramine (R06AA02), Promethazine (R06AD02)                                                                                                                                                                                                                                                                                                                                                                                                                                                                                                                                                                                                                                                                                                                                                                                                                                                               |
| <b>Various</b>                                                         | Perflutren lipid microspheres (V08DA01)                                                                                                                                                                                                                                                                                                                                                                                                                                                                                                                                                                                                                                                                                                                                                                                                                                                                         |

\*From QTDrug list, <https://crediblemeds.org/>, version December 17, 2015. Only drugs available in Denmark are included at our list. The list includes drugs with known risk of TdP, possible risk of TdP, and conditional risk of TdP.

\*\*ATC = Anatomical Therapeutic Chemical

## Appendix D – Supplementary results

Results from stratified analysis. Although further strata than shown in this table were preplanned (e.g. stratification on all poisoning groups and age), we only stratified when possible due to a small number of events.

|                            | QTc prolongation<br>QTc ≥450 ms, men<br>QTc ≥460 ms, women | Normal QTc interval<br><440 ms, men and women | HR*<br>(95% CI) |
|----------------------------|------------------------------------------------------------|-----------------------------------------------|-----------------|
|                            | Events (n)**                                               | Events (n)**                                  |                 |
| <b>Suspected poisoning</b> |                                                            |                                               |                 |
| Total                      | 8 (248)                                                    | n<5 (496)                                     | 3.6 (1.0-12.2)  |
| Male                       | n<5                                                        | n<5                                           | 2.7 (0.5-16.3)  |
| Female                     | n<5                                                        | n<5                                           | 4.4 (0.8-24.3)  |
| Age ≥50 years              | 6 (131)                                                    | n<5                                           | 2.7 (0.7-9.9)   |
| Odense or Esbjerg          | n<5                                                        | n<5                                           | 5.8 (0.6-57.4)  |
| Lund                       | n<5                                                        | n<5                                           | 1.7 (0.2-12.2)  |
| Helsingborg                | n<5                                                        | n<5                                           | 4.4 (0.4-49.2)  |
| <b>Confirmed poisoning</b> |                                                            |                                               |                 |
| Total                      | 6 (151)                                                    | n<5                                           | 10.5 (1.2-90.0) |
| Psychotropic drugs         | n<5                                                        | n<5                                           | 2.0 (0.1-32.5)  |

Abbreviations: HR; hazard ratio, CI; confidence interval.

\*Hazard ratio from Cox regression.

\*\*If the number of events in the analysis was less than 5 (marked by n<5), the number of patients in the strata is not shown.

## STROBE Statement—checklist of items that should be included in reports of observational studies

|                              | Item No | Recommendation                                                                                                                                                                                                                                                                                                                                                                                                                                                                                                                                                                                                                                                                                                                                                                                                                                                                                     |
|------------------------------|---------|----------------------------------------------------------------------------------------------------------------------------------------------------------------------------------------------------------------------------------------------------------------------------------------------------------------------------------------------------------------------------------------------------------------------------------------------------------------------------------------------------------------------------------------------------------------------------------------------------------------------------------------------------------------------------------------------------------------------------------------------------------------------------------------------------------------------------------------------------------------------------------------------------|
| <b>Title and abstract</b>    | 1       | (a) Indicate the study's design with a commonly used term in the title or the abstract<br><b>Page 1 and 2</b><br>(b) Provide in the abstract an informative and balanced summary of what was done and what was found<br><b>Page 2</b>                                                                                                                                                                                                                                                                                                                                                                                                                                                                                                                                                                                                                                                              |
| <b>Introduction</b>          |         |                                                                                                                                                                                                                                                                                                                                                                                                                                                                                                                                                                                                                                                                                                                                                                                                                                                                                                    |
| Background/rationale         | 2       | Explain the scientific background and rationale for the investigation being reported<br><b>Page 3</b>                                                                                                                                                                                                                                                                                                                                                                                                                                                                                                                                                                                                                                                                                                                                                                                              |
| Objectives                   | 3       | State specific objectives, including any prespecified hypotheses<br><b>Page 3</b>                                                                                                                                                                                                                                                                                                                                                                                                                                                                                                                                                                                                                                                                                                                                                                                                                  |
| <b>Methods</b>               |         |                                                                                                                                                                                                                                                                                                                                                                                                                                                                                                                                                                                                                                                                                                                                                                                                                                                                                                    |
| Study design                 | 4       | Present key elements of study design early in the paper<br><b>Page 3</b>                                                                                                                                                                                                                                                                                                                                                                                                                                                                                                                                                                                                                                                                                                                                                                                                                           |
| Setting                      | 5       | Describe the setting, locations, and relevant dates, including periods of recruitment, exposure, follow-up, and data collection<br><b>Page 3-5</b>                                                                                                                                                                                                                                                                                                                                                                                                                                                                                                                                                                                                                                                                                                                                                 |
| Participants                 | 6       | (a) <i>Cohort study</i> —Give the eligibility criteria, and the sources and methods of selection of participants. Describe methods of follow-up<br><b>Page 4 and 5</b><br><i>Case-control study</i> —Give the eligibility criteria, and the sources and methods of case ascertainment and control selection. Give the rationale for the choice of cases and controls<br><i>Cross-sectional study</i> —Give the eligibility criteria, and the sources and methods of selection of participants<br>(b) <i>Cohort study</i> —For matched studies, give matching criteria and number of exposed and unexposed<br><b>Page 5</b> (As we did a propensity score analysis the number of exposed and unexposed are outlined in the results because it cannot be provided before the analysis)<br><i>Case-control study</i> —For matched studies, give matching criteria and the number of controls per case |
| Variables                    | 7       | Clearly define all outcomes, exposures, predictors, potential confounders, and effect modifiers. Give diagnostic criteria, if applicable<br><b>Page 4, 5, and Appendix B and C</b>                                                                                                                                                                                                                                                                                                                                                                                                                                                                                                                                                                                                                                                                                                                 |
| Data sources/<br>measurement | 8*      | For each variable of interest, give sources of data and details of methods of assessment (measurement). Describe comparability of assessment methods if there is more than one group<br><b>Page 4 and Appendix A, B, and C</b>                                                                                                                                                                                                                                                                                                                                                                                                                                                                                                                                                                                                                                                                     |
| Bias                         | 9       | Describe any efforts to address potential sources of bias<br><b>Page 6</b>                                                                                                                                                                                                                                                                                                                                                                                                                                                                                                                                                                                                                                                                                                                                                                                                                         |
| Study size                   | 10      | Explain how the study size was arrived at<br><b>Page 4 and figure 1</b>                                                                                                                                                                                                                                                                                                                                                                                                                                                                                                                                                                                                                                                                                                                                                                                                                            |
| Quantitative variables       | 11      | Explain how quantitative variables were handled in the analyses. If applicable,                                                                                                                                                                                                                                                                                                                                                                                                                                                                                                                                                                                                                                                                                                                                                                                                                    |

1 describe which groupings were chosen and why

2 **Page 5**

3  
4 Statistical methods 12 (a) Describe all statistical methods, including those used to control for confounding

5 **Page 5 and 6**

6 (b) Describe any methods used to examine subgroups and interactions

7 **Page 5 and 6**

8 (c) Explain how missing data were addressed

9 **No missing data.**

10 (d) *Cohort study*—If applicable, explain how loss to follow-up was addressed

11 **No loss to follow-up.**

12 *Case-control study*—If applicable, explain how matching of cases and controls was  
13 addressed

14 *Cross-sectional study*—If applicable, describe analytical methods taking account of  
15 sampling strategy

16 (e) Describe any sensitivity analyses

17 **Page 6**

18  
19  
20 Continued on next page

| <b>Results</b>    |     |                                                                                                                                                                                                                                                                                                                                                                                                                                                                                          |
|-------------------|-----|------------------------------------------------------------------------------------------------------------------------------------------------------------------------------------------------------------------------------------------------------------------------------------------------------------------------------------------------------------------------------------------------------------------------------------------------------------------------------------------|
| Participants      | 13* | (a) Report numbers of individuals at each stage of study—eg numbers potentially eligible, examined for eligibility, confirmed eligible, included in the study, completing follow-up, and analysed<br><b>Page 6</b><br>(b) Give reasons for non-participation at each stage<br><b>Page 6</b><br>(c) Consider use of a flow diagram<br><b>Figure 1</b>                                                                                                                                     |
| Descriptive data  | 14* | (a) Give characteristics of study participants (eg demographic, clinical, social) and information on exposures and potential confounders<br><b>Page 6 and 7, including table 1</b><br>(b) Indicate number of participants with missing data for each variable of interest<br><b>None missing</b><br>(c) <i>Cohort study</i> —Summarise follow-up time (eg, average and total amount)<br><b>Page 8</b>                                                                                    |
| Outcome data      | 15* | <i>Cohort study</i> —Report numbers of outcome events or summary measures over time<br><b>Page 8 and table 3</b><br><i>Case-control study</i> —Report numbers in each exposure category, or summary measures of exposure<br><i>Cross-sectional study</i> —Report numbers of outcome events or summary measures                                                                                                                                                                           |
| Main results      | 16  | (a) Give unadjusted estimates and, if applicable, confounder-adjusted estimates and their precision (eg, 95% confidence interval). Make clear which confounders were adjusted for and why they were included<br><b>Page 7 and 8 including table 3</b><br>(b) Report category boundaries when continuous variables were categorized<br><b>Page 5</b><br>(c) If relevant, consider translating estimates of relative risk into absolute risk for a meaningful time period<br><b>Page 8</b> |
| Other analyses    | 17  | Report other analyses done—eg analyses of subgroups and interactions, and sensitivity analyses<br>The prevalence of QTc prolongation in relation to specific subgroups: <b>page 7 and table 2.</b><br><b>Appendix D</b> includes a stratified analysis.<br>Sensitivity analysis: <b>page 8 and 9.</b>                                                                                                                                                                                    |
| <b>Discussion</b> |     |                                                                                                                                                                                                                                                                                                                                                                                                                                                                                          |
| Key results       | 18  | Summarise key results with reference to study objectives<br><b>Page 9</b>                                                                                                                                                                                                                                                                                                                                                                                                                |
| Limitations       | 19  | Discuss limitations of the study, taking into account sources of potential bias or imprecision. Discuss both direction and magnitude of any potential bias<br><b>Page 9 and 10.</b>                                                                                                                                                                                                                                                                                                      |
| Interpretation    | 20  | Give a cautious overall interpretation of results considering objectives, limitations, multiplicity of analyses, results from similar studies, and other relevant evidence<br><b>Page 10 and 11.</b>                                                                                                                                                                                                                                                                                     |
| Generalisability  | 21  | Discuss the generalisability (external validity) of the study results<br><b>Page 9 and 10.</b>                                                                                                                                                                                                                                                                                                                                                                                           |

**Other information**

---

Funding 22 Give the source of funding and the role of the funders for the present study and, if applicable, for the original study on which the present article is based

**Page 12**

\*Give information separately for cases and controls in case-control studies and, if applicable, for exposed and unexposed groups in cohort and cross-sectional studies.

**Note:** An Explanation and Elaboration article discusses each checklist item and gives methodological background and published examples of transparent reporting. The STROBE checklist is best used in conjunction with this article (freely available on the Web sites of PLoS Medicine at <http://www.plosmedicine.org/>, Annals of Internal Medicine at <http://www.annals.org/>, and Epidemiology at <http://www.epidem.com/>). Information on the STROBE Initiative is available at [www.strobe-statement.org](http://www.strobe-statement.org).

# BMJ Open

## The association between QTc prolongation and mortality in patients with suspected poisoning in the emergency department – a transnational propensity score matched cohort study

|                                 |                                                                                                                                                                                                                                                                                                                                                                                                                                                                                                                                                                                                                            |
|---------------------------------|----------------------------------------------------------------------------------------------------------------------------------------------------------------------------------------------------------------------------------------------------------------------------------------------------------------------------------------------------------------------------------------------------------------------------------------------------------------------------------------------------------------------------------------------------------------------------------------------------------------------------|
| Journal:                        | <i>BMJ Open</i>                                                                                                                                                                                                                                                                                                                                                                                                                                                                                                                                                                                                            |
| Manuscript ID                   | bmjopen-2017-020036.R1                                                                                                                                                                                                                                                                                                                                                                                                                                                                                                                                                                                                     |
| Article Type:                   | Research                                                                                                                                                                                                                                                                                                                                                                                                                                                                                                                                                                                                                   |
| Date Submitted by the Author:   | 17-Mar-2018                                                                                                                                                                                                                                                                                                                                                                                                                                                                                                                                                                                                                |
| Complete List of Authors:       | Schade Hansen, Camilla; Odense Universitetshospital, Department of Emergency Medicine<br>Pottegard, Anton; University of Southern Denmark, Clinical Pharmacology, Institute of Public Health<br>Ekelund, U; Skåne University Hospital, Department of Emergency Medicine<br>Kildegaard Jensen, Helene; Odense Universitetshospital, Department of Emergency Medicine<br>Lundager Forberg, Jakob; Helsingborg Hospital, Department of Emergency Medicine<br>Brabrand, Mikkel; Odense University Hospital, Department of Emergency Medicine<br>Lassen, Annmarie; Odense University Hospital, Department of Emergency Medicine |
| <b>Primary Subject Heading</b>: | Emergency medicine                                                                                                                                                                                                                                                                                                                                                                                                                                                                                                                                                                                                         |
| Secondary Subject Heading:      | Epidemiology, Cardiovascular medicine                                                                                                                                                                                                                                                                                                                                                                                                                                                                                                                                                                                      |
| Keywords:                       | EPIDEMIOLOGY, CARDIOLOGY, TOXICOLOGY                                                                                                                                                                                                                                                                                                                                                                                                                                                                                                                                                                                       |
|                                 |                                                                                                                                                                                                                                                                                                                                                                                                                                                                                                                                                                                                                            |

SCHOLARONE™  
Manuscripts



# The association between QTc prolongation and mortality in patients with suspected poisoning in the emergency department – a transnational propensity score matched cohort study

Camilla Schade Hansen MD<sup>1\*</sup>, Anton Pottegård MScPharm PhD<sup>2</sup>, Ulf Ekelund MD, PhD<sup>3</sup>, Helene Kildegaard Jensen MD<sup>1</sup>, Jakob Lundager Forberg MD PhD<sup>4</sup>, Mikkel Brabrand MD, PhD<sup>1,5</sup>, Anmarie Touborg Lassen MD, DMSci<sup>1</sup>

1. Department of Emergency Medicine, Odense University Hospital, Odense, Denmark
2. Clinical Pharmacology and Pharmacy, Department of Public Health, University of Southern Denmark, Odense, Denmark
3. Department of Emergency Medicine, Skåne University Hospital, Lund, Sweden
4. Department of Emergency Medicine, Helsingborg Hospital, Helsingborg, Sweden
5. Department of Emergency Medicine, Hospital of South West Jutland, Esbjerg, Denmark

Word count text: 2882

\*Correspondence to:  
camilla.schade.hansen@rsyd.dk  
Telephone: + 45 28155105  
Sdr. Boulevard 29  
5000 Odense C  
Denmark

## ABSTRACT

**OBJECTIVES:** Poisoning is a frequent cause of admission to the emergency department (ED), and may involve drugs known to prolong the QT interval. The aims of this study were to describe the prevalence of QTc prolongation among ED patients with suspected poisoning and to calculate the absolute and relative risk of mortality or cardiac arrest associated with a prolonged QTc interval.

**METHODS:** We performed a register-based cohort study, including all adult first time contacts with suspected poisoning to the ED of two Swedish hospitals (January 2010 to December 2014) and two Danish hospitals (March 2013 to April 2014). We used propensity score matching to calculate hazard ratios (HR) for all-cause mortality or cardiac arrest (combined endpoint) within 30 days after contact comparing patients with a prolonged QTc interval ( $\geq 450$  ms men,  $\geq 460$  ms women) with patients with a QTc interval of  $< 440$  ms.

**RESULTS:** Among all first-time contacts with suspected poisoning that had an ECG recorded within four hours after arrival ( $n = 3869$ ), QTc prolongation occurred in 6.5%. The overall mortality after a 30-day follow-up period was 0.8% (95% CI, 0.6-1.2), with an absolute risk of mortality or cardiac arrest in patients with QTc prolongation of 3.2% (95% CI, 1.4-6.1). A prolonged QTc interval on arrival was associated with a HR of 3.6 (95% CI, 1.0-12.2).

**CONCLUSION:** In the ED, a prolonged QTc interval in patients arriving with suspected poisoning seems to be associated with a three-fold increased risk of 30-day all-cause mortality or cardiac arrest.

### Strengths and limitations of the study

Patients were included from four different hospitals – two Swedish and two Danish.

Propensity score matching was used to adjust for several confounders.

Subgroups analysis was not possible due to a small number of events.

The included ECGs were all automatic readouts and the length of the QT interval was not confirmed manually.

## INTRODUCTION

Poisoning is a frequent cause of admission to the emergency department (ED),<sup>1,2</sup> and involves a variety of different drugs and substances. A wide range of drugs have been linked to QTc prolongation,<sup>3</sup> which has been associated with all-cause-mortality, cardiovascular death, and sudden cardiac death.<sup>4-9</sup> As an increased risk of mortality has been documented in patients treated with potential QTc prolonging drugs,<sup>10-13</sup> one may hypothesize that the risk is even higher among poisoned patients. Therefore, cardiac monitoring is recommended in patients poisoned by potentially proarrhythmic agents and drugs that can lead to torsades de pointes.<sup>14</sup>

Only few studies have investigated the relationship between QTc prolongation and adverse outcomes in a population of undifferentiated poisoned patients.<sup>15,16</sup> The absolute and relative risk of mortality and cardiac arrest associated to QTc prolongation in poisoned patients remains unknown. Therefore, we aimed to: (1) describe the prevalence of QTc prolongation found among patients with suspected poisoning in the emergency department; (2) to investigate if QTc prolongation is associated with an increased risk of mortality or cardiac arrest within 30 days after arrival to the emergency department.

## MATERIALS AND METHODS

### Study design and setting

This is a register-based cohort study. The study is based on ED data from January 1 2010 to December 31 2014 from two Swedish hospitals (Skåne University Hospital, Lund and Helsingborg Hospital) and from two Danish hospitals (Odense University Hospital and the Hospital of South West Jutland, Esbjerg) from March 1 2013 to April 30 2014. In both Denmark and Sweden, the healthcare systems are tax-funded and all residents have free access to healthcare. The University

1  
2  
3  
4 Hospital Skåne has a contingency population of approximately 310,000, whereas Odense  
5 University Hospital covers a population of 290,000 people. The two regional hospitals have a  
6 contingency population of 250,000 people (Helsingborg), and 220,000 people (Esbjerg).  
7  
8  
9

### 10 **Selection of participants**

11 We identified all adults ( $\geq 18$  years), who arrived to the EDs with suspected poisoning. The contacts  
12 were eligible for the main analysis if they had a 12-lead ECG recorded within 4 hours after arrival.  
13  
14 A missing QTc interval on the recorded ECG, or a QRS duration of  $\geq 120$  ms were both reasons for  
15 exclusion. Patients with multiple contacts were included only at their first contact with suspected  
16 poisoning within the study period. Information regarding identification of patients with suspected  
17 poisoning is outlined in Appendix A.  
18  
19  
20  
21  
22  
23

### 24 **Data sources**

25 In both Denmark and Sweden, all residents have a unique personal civil registration number,  
26 which allows cross-linkage at personal level between databases. We extracted data from several  
27 registries: The logistic systems in the ED at the Region of Southern Denmark<sup>17</sup> and Region of  
28 Skåne, the electronic central ECG databases at Region of Southern Denmark and Region of Skåne,  
29 the Danish National Patient Registry<sup>18</sup> and Region of Skåne Health care databases, the Danish  
30 National Prescription Registry,<sup>19</sup> the Swedish Pharmacy Registry,<sup>20</sup> and finally The Danish Civil  
31 Registration System<sup>21</sup> and the Swedish Population Register.<sup>22</sup> Further information regarding the  
32 data sources is provided in Appendix A.  
33  
34  
35  
36  
37  
38  
39  
40

### 41 **ECG measurements and definitions**

42 The QT interval was measured at the first ECG recorded after contact to the ED. All the QT  
43 intervals were calculated automatically as a median value and stored in either MUSE Cardiology  
44 Information System (GE Healthcare) or Philips Diagnostic ECG. The GE Marquette 12SL ECG  
45 Analysis Program provided QTc intervals for ECGs recoded in MUSE.<sup>23</sup> ECGs recorded by Phillips  
46 were analyzed by the DXL-algorithm.<sup>24</sup> Only QT intervals corrected for heart rate (QTc) was used in  
47 our analysis. For correction, we chose the Framingham Formula ( $QT_{c\text{Framingham}} = QT + 0.154 (1 -$   
48  $RR)$ ).<sup>25</sup> Additional details about ECG measurements are outlined in Appendix B.  
49  
50  
51  
52  
53  
54  
55  
56  
57  
58  
59  
60

## Exposure and outcome

Our primary outcome was a combined endpoint of all-cause mortality or cardiac arrest (defined in Appendix C.1) within 30 days from the day of arrival to the ED. All patients were followed for 30 days, including those transferred to another department. Patients who died in relation to cardiac arrest were classified as dead rather than cardiac arrests. The primary exposure was QTc prolongation, defined as a QTc of  $\geq 450$  ms for men and  $\geq 460$  ms for women.<sup>26</sup> Patients with a normal QTc length were defined as having a QTc interval of  $< 450$  ms (men) or  $< 460$  ms (women).

## Analysis

The prevalence of QTc prolongation overall, and in relation to specific groups of poisoning was described in a cross-sectional description. In this description, we identified all patients with a discharge diagnosis of poisoning (International Classification of Diseases (ICD-10) codes T36\*-T65\*, F100\*, F110\*, F120\*, F130\*, F140\*, F150\*, F160\*, F170\*, F180\* or F190\* as a primary or secondary diagnosis). All patients, who had a discharge diagnosis of poisoning, were subdivided into five poisoning groups: 1. Analgesics and drugs of abuse, 2. Psychotropic drugs including drugs affecting the central nervous system, 3. Organic and chemical substances, non-medical, 4. Others, and 5. Multidrug (see Appendix C.2).

The association between QTc prolongation and all-cause mortality and cardiac arrest was evaluated using propensity score matching.<sup>27,28</sup> We calculated a propensity score for all included patients by use of logistic regression with QTc  $\geq 450$  ms (men) or  $\geq 460$  ms (women) as the outcome (binary outcome). Patients with a QTc interval between 440-449 ms (men) and 440-459 ms (women) were excluded in the model to avoid near-overlapping ranges. The following possible confounders were included in the propensity score model: sex, age, comorbidity (measured as Charlson Comorbidity Index<sup>29,30</sup>), history of myocardial infarction or congestive heart failure (Appendix C3. and C.4), prescription of QT prolonging drugs within 90 days (defined in Appendix C.5)<sup>31</sup>, heart rate, and study center. We performed a 1:2 parallel balanced nearest neighbor matching without replacement and with a caliper of 0.05.<sup>32</sup> In the matched cohorts, 30-day mortality was modelled using Cox regression.

## Statistics

1  
2  
3  
4 The absolute risk of event in patients with suspected poisoning was calculated overall, for those  
5 with QTc prolongation and for those without QTc prolongation. In the propensity score matched  
6 cohort, the risk associated with QTc prolongation was estimated as hazard ratios (HR). We  
7 estimated 95% confidence intervals based on a binominal distribution. To illustrate the impact of  
8 QTc prolongation on 30-days all-cause mortality or cardiac arrest we generated a Kaplan Meier  
9 failure curve.  
10  
11  
12  
13

14 In a sensitivity analysis, we restricted the material to individuals who were both suspected of  
15 being poisoned on arrival and received a discharge diagnose of poisoning. The prevalence of QTc  
16 prolongation and the propensity score analyses were repeated using the Bazett formula for QT  
17 correction.<sup>33</sup>  
18  
19  
20

21 Statistical analyses were performed using STATA version 14 (StataCorp LP, College Station, Texas).  
22 The study was approved by the Danish Data Protection Agency (No. 2008-58-0035, Journal nr.  
23 15/21632) and The Danish Health Authority (No. 3-3013-1031). In consistency with Swedish law  
24 the study was approved by the Regional Ethics Committee in Lund and by Region Skåne.  
25  
26  
27  
28  
29

### 30 **Patient and public involvement**

31 This was a study without contact to patients. All information was obtained through registers.  
32  
33  
34

## 35 **RESULTS**

### 36 **Characteristics of the study cohort**

37 At the four hospitals, we identified a total of 6838 ED contacts with suspected poisoning. After  
38 exclusion of those aged <18 years (n=22), an ECG not recorded in an acceptable time-interval  
39 (n=1411), multiple contacts within the study period (n=1412), a missing QT interval (n=1), or QRS  
40 duration  $\geq 120$  ms (n=123) the final cohort comprised 3869 patients with suspected poisoning  
41 (48.0% men, median age 38) (Figure 1). Of these, 69.2% (n=2676) had a discharge diagnose of  
42 poisoning.  
43  
44  
45  
46  
47  
48  
49

50 Patients with a prolonged QTc interval were older, had more comorbidity, and more commonly  
51 had a history of heart disease than those without QTc prolongation (Table 1).  
52  
53

54 **Table 1: Baseline characteristics of the study population**  
55

|                                                                      | All*        | Before propensity score matching |                                                   | After propensity score matching |                                                   |
|----------------------------------------------------------------------|-------------|----------------------------------|---------------------------------------------------|---------------------------------|---------------------------------------------------|
|                                                                      |             | QTc<br><440 ms (men and women)   | Prolonged QTc<br>≥450 ms (men)<br>≥460 ms (women) | QTc<br><440 ms (men and women)  | Prolonged QTc<br>≥450 ms (men)<br>≥460 ms (women) |
| <b>N</b>                                                             | <b>3869</b> | <b>3296</b>                      | <b>253</b>                                        | <b>496</b>                      | <b>248</b>                                        |
| <b>Sex</b>                                                           |             |                                  |                                                   |                                 |                                                   |
| Male (%)                                                             | 1859 (48.0) | 1634 (49.6)                      | 121 (47.8)                                        | 229 (46.2)                      | 119 (48.0)                                        |
| <b>Age (median, IQR)</b>                                             | 38 (25-53)  | 36 (24-51)                       | 52 (36-68)                                        | 53 (37-69)                      | 51 (35-66)                                        |
| 18-50 – n (%)                                                        | 2747 (71.0) | 2444 (74.2)                      | 119 (47.0)                                        | 236 (48.0)                      | 119 (48.0)                                        |
| 51-69 – n (%)                                                        | 788 (20.4)  | 611 (18.5)                       | 77 (30.4)                                         | 140 (28.5)                      | 77 (31.0)                                         |
| ≥70 – n (%)                                                          | 334 (8.6)   | 241 (7.3)                        | 57 (22.5)                                         | 116 (23.6)                      | 52 (21.0)                                         |
| <b>Charlson Comorbidity Index – n (%)</b>                            |             |                                  |                                                   |                                 |                                                   |
| CCI = 0                                                              | 2747 (71.0) | 2395 (72.7)                      | 140 (55.3)                                        | 263 (53.0)                      | 140 (56.5)                                        |
| CCI = 1                                                              | 718 (18.6)  | 587 (17.8)                       | 60 (23.7)                                         | 133 (26.8)                      | 58 (23.4)                                         |
| CCI ≥ 2                                                              | 404 (10.4)  | 314 (9.5)                        | 53 (20.9)                                         | 100 (20.2)                      | 50 (20.2)                                         |
| <b>Myocardial infarction or congestive heart failure – n (%)</b>     | 185 (4.8)   | 136 (4.1)                        | 32 (12.6)                                         | 55 (11.1)                       | 29 (11.7)                                         |
| <b>QT-prolonging drugs – n (%)</b>                                   | 1518 (39.2) | 1248 (37.9)                      | 110 (43.5)                                        | 213 (42.9)                      | 109 (44.0)                                        |
| <b>ECG measurements</b>                                              |             |                                  |                                                   |                                 |                                                   |
| Heart rate (median, IQR)                                             | 85 (73-99)  | 87 (74-101)                      | 76 (65-84)                                        | 76 (65-87)                      | 76 (65-85)                                        |
| QTc ≥500 ms – n (%)                                                  | 27 (0.7)    | -                                | 27 (10.7)                                         | -                               | 27 (10.9)                                         |
| <b>Any diagnose of poisoning – n (%)</b>                             | 2676 (69.2) | 2282 (69.2)                      | 153 (60.5)                                        | 310 (62.5)                      | 151 (60.9)                                        |
| <b>Group of poisoning – n (%)</b>                                    |             |                                  |                                                   |                                 |                                                   |
| 1. Analgesics and drugs of abuse                                     | 397 (14.8)  | 333 (14.6)                       | 21 (13.7)                                         | 41 (13.2)                       | 21 (13.9)                                         |
| 2. Psychotropic drugs and drugs affecting the central nervous system | 805 (30.1)  | 695 (30.5)                       | 49 (32.0)                                         | 103 (33.2)                      | 49 (32.5)                                         |
| 3. Organic and chemical substances, non-medical                      | 502 (18.8)  | 437 (19.1)                       | 24 (15.7)                                         | 50 (16.1)                       | 24 (15.9)                                         |
| 4. Others                                                            | 470 (17.6)  | 392 (17.2)                       | 30 (19.6)                                         | 54 (17.4)                       | 29 (19.2)                                         |
| 5. Multidrug                                                         | 502 (18.8)  | 425 (18.6)                       | 29 (19.0)                                         | 62 (20.0)                       | 28 (18.5)                                         |
| <b>Clinics – n (%)</b>                                               |             |                                  |                                                   |                                 |                                                   |
| The University Hospital Skåne, Lund                                  | 1794 (46.4) | 1539 (46.7)                      | 125 (49.4)                                        | 247 (49.8)                      | 124 (50.0)                                        |
| Odense University Hospital                                           | 501 (12.9)  | 419 (12.7)                       | 28 (11.1)                                         | 50 (10.1)                       | 28 (11.3)                                         |
| Helsingborg Hospital                                                 | 1372 (35.5) | 1176 (35.7)                      | 81 (32.0)                                         | 170 (34.3)                      | 79 (31.9)                                         |
| Hospital of South West Jutland                                       | 202 (5.2)   | 162 (4.9)                        | 19 (7.5)                                          | 29 (5.8)                        | 17 (6.9)                                          |

Abbreviations: CCI, Charlson Comorbidity Index; IQR, interquartile range.

\*In the total cohort patients with a near-overlapping QTc interval (440-449 ms men, 440-459 ms women) are included (n =320).

In addition, prescription of QT prolonging drugs was more frequent in the group with a prolonged QTc interval. Among patients with a redeemed prescription of a single QT prolonging drug 7.5% had a prolonged QTc interval, whereas 8.8% of those taken two or more QT prolonging drugs had a prolonged QTc interval. Among the included patients, 6.5% (95% CI, 5.9-7.4) had QTc prolongation, while the prevalence of severe QTc prolongation (≥500 ms) was 0.7% (95% CI, 0.5-1.0). The prevalence of QTc prolongation in relation to specific groups of poisoning varied within the range 4.8-6.2%, with the highest prevalence in the group categorized as “others” (6.2%; 95% CI, 4.8-8.7) (Table 2).

**Table 2: QTc prolongation in relation to poisoning groups**

|                                         | Analgesics and drugs of abuse         | Psychotropic drugs including the central nervous system | Chemical and biological substances, non-medical | Others                | Multidrug                            |
|-----------------------------------------|---------------------------------------|---------------------------------------------------------|-------------------------------------------------|-----------------------|--------------------------------------|
| ICD-10 codes or definition              | T39-T40, F110, F120, F140, F150, F160 | T42-T44, F130, F190                                     | T51-T65, F100, F170, F180                       | T36-T38, T41, T45-T50 | ≥2 of the described poisoning groups |
| N                                       | 397                                   | 805                                                     | 502                                             | 470                   | 502                                  |
| <b>QTc prolongation</b> – n (%; CI 95%) |                                       |                                                         |                                                 |                       |                                      |
| ≥450 ms (men)                           | 21 (5.3%; 3.3-8.0)                    | 49 (6.1%; 4.5-8.0)                                      | 24 (4.8%; 3.1-7.0)                              | 29 (6.2%; 4.2-8.7)    | 28 (5.6%; 3.7-8.0)                   |
| ≥460 ms (women)                         |                                       |                                                         |                                                 |                       |                                      |

Abbreviation: CI, confidence interval.

### Prognosis

Overall, the 30-day risk of all-cause mortality or cardiac arrest was 0.8% (95% CI, 0.6-1.2, n=32).

Among individuals with QTc prolongation (n= 253), death within 30 days after contact to the ED occurred in 7 patients, whereas one patient suffered from cardiac arrest. Among those with a normal QTc interval (n=3616), we found 24 events during the follow-up period. The absolute risk of event within 30 days was 3.2% (95% CI, 1.4-6.1) and 0.7% (95% CI, 0.5-1.0) for patients with and without QTc prolongation, respectively.

The propensity score analysis included 248 patients with a QTc of ≥450 ms (men) or ≥460 ms (women) matched with 496 patients with a QTc interval <440 ms. Acceptable balance of baseline variables was achieved (Table 1). QTc prolongation was associated with a HR of 3.6 (95% CI, 1.0-12.2) for 30-day all-cause mortality or cardiac arrest (Table 3 and Figure 2).

| Propensity score matched cohort                 |     |              |                 |
|-------------------------------------------------|-----|--------------|-----------------|
|                                                 | n   | Events (No.) | HR** (95% CI)   |
| <b>Suspected poisoning</b>                      |     |              |                 |
| Normal QTc interval <440 ms                     | 496 | n<5          | 1.0 (ref)       |
| QTc prolongation ≥450 ms, men<br>≥460 ms, women | 248 | 8            | 3.6 (1.0-12.2)  |
| <b>Diagnose of poisoning*</b>                   |     |              |                 |
| Normal QTc interval <440 ms                     | 310 | n<5          | 1.0 (ref)       |
| QTc prolongation ≥450 ms, men<br>≥460 ms, women | 151 | 6            | 10.5 (1.2-90.0) |



|  |  |  |  |
|--|--|--|--|
|  |  |  |  |
|--|--|--|--|

Abbreviations: CI, confidence interval; HR, hazard ratio. If the number of events in the analysis was less than 5 (marked by n<5), the number of patients in the strata is not shown.

\*Patient who arrived with suspected poisoning and had a discharge diagnose of poisoning.

\*\*Cox regression calculated after 1:2 propensity score matching comparing patients with QTc prolongation to patients without QTc prolongation. In this population, patients with near-overlapping ranges of the QTc interval were excluded (QTc 440-449 ms, men and 440-459 ms, women).

### Subgroups and sensitivity analyses

Our results from the subgroup analysis are outlined in Appendix D. When restricting to those who also received a discharge diagnose of poisoning, we found an overall 30-day risk of 0.7% (95% CI, 0.4-1.1) and QTc prolongation yielded an overall HR of 10.5 (95% CI, 1.2-90.0). When we corrected the QT interval with the Bazett formula a total of 1112 patients had QTc prolongation (28.7%), which was associated with a HR of 1.0 (95% CI, 0.2-5.5).

## DISCUSSION

In this transnational cohort of patients with suspected poisoning arriving to the ED, QTc prolongation was common (6.5%). A prolonged QTc interval was associated with a three-fold increased risk of 30-day all-cause mortality or cardiac arrest and an absolute risk of 3.2%.

This study has several strengths. First, this was a multicenter cohort study with data from two Swedish and two Danish EDs which ensured a broad representability. Use of personal identification numbers in all contacts to the hospital system in Sweden and Denmark provide the possibility to follow individual patients in and out of hospital and loss of follow-up or unmeasured registration of death did not occur.<sup>17-22</sup> In addition, we implemented several confounders in our propensity score model, and thus managed to control for these despite a low event-rate. We included patients who were suspected for being poisoned on arrival to the ED. These patients do – in contrast to patients identified by their discharge diagnosis – represent the clinical situation at

1  
2  
3  
4 the door in the ED. At this point, the doctors have to decide whether or not to observe the  
5 patients using telemetry.  
6  
7

8  
9 This study also has several limitations. First of all, the design was an observational design. The ECG  
10 measures were all automatic readouts, and we did not manually validate the length of the QT  
11 intervals. However, this method has been validated in a previous Danish study using the same  
12 technique, which showed a good overall agreement between manual QTc interval and the digital  
13 record of the QTc interval with a mean difference of 1.3 ms.<sup>8</sup> Further, we did not exclude ECGs  
14 with diagnoses complicating QTc measuring, e.g. atrial fibrillation. We did not have information  
15 regarding previous ECGs, and we do not know if some patients had a previous ECG with QTc  
16 prolongation before arrival with suspected poisoning. The dose of drug or substance was  
17 unknown, and we were ignorant of the timing of the ECG recording in relation to peak drug  
18 concentration. The poisonings were not confirmed by blood samples or by urine tests, but were  
19 extracted from predefined ICD-10 codes. In addition, administration of diuretics and possible  
20 electrolyte imbalance were unknown.  
21  
22

23  
24 The small number of events was a limitation in its own and did not allow for meaningful subgroup  
25 analysis. As cardiac arrest was identified based on hospital registration an eventually event of  
26 unregistered cardiac arrest, where the patient survived, is not included as an event. The number  
27 of these events is believed to be small as registration of cardiac arrest is mandatory in both the  
28 Swedish and Danish health care system. With a small number of events any miscounting of events  
29 would lead to considerable change in risk estimates. If we have overlooked one event of cardiac  
30 arrest who survived in the group of patients with QTc prolongation it would increase the absolute  
31 risk from 3.2% to 3.6%, while the risk of event in the entire study population would increase from  
32 0.8% to 0.9%.  
33  
34  
35  
36  
37  
38  
39  
40  
41  
42  
43  
44  
45

46  
47 The event-rate in our cohort (0.8%) is in accordance with previous studies of poisoned patients  
48 (0.5-1.2%).<sup>16,34,35</sup> In contrast, the prevalence of QTc prolongation is substantially lower (6.5%) than  
49 in a previous study of unselected ED patients (35%).<sup>36</sup> This is probably due to the choice of QT  
50 correcting formula. If the Bazett formula had been chosen for main analysis, the prevalence of QTc  
51 prolongation in our study population would have been 28,7%. It is of broad consensus that the  
52  
53  
54  
55  
56  
57  
58  
59  
60

1  
2  
3  
4 more widely used Bazett formula tends to overcorrect at heart rates at 80-90 beats per minute  
5 and above resulting in a higher prevalence of QTc prolongation.<sup>33,37</sup> As a high percentage of acute  
6 patients have tachycardia at arrival, this probably explains most of the difference between the  
7 occurrence of QTc prolongation in our study and in the study of unselected ED patients. The  
8 Framingham formula used in our study is considered superior compared with the more widely  
9 used Bazett formula.<sup>37</sup>  
10  
11  
12  
13  
14  
15

16 The clinical impact of our findings is the difference in risk of all-cause mortality and cardiac arrest  
17 within 30 days in respect to QTc prolongation. We found an absolute risk of 0.7% in patients with  
18 suspected poisoning without QTc prolongation, whereas patients with a prolonged QTc interval  
19 have an absolute risk of 3.2%, which translates into a HR of 3.6 (95% CI, 1.0-12.2). In the general  
20 population, a meta-analysis reported a pooled relative risk of 1.35 (95% CI, 1.24-1.46) for long-  
21 term mortality in patients with QTc prolongation.<sup>7</sup> A recent study including all patients who had an  
22 ECG recorded at the hospital for any reason reported QTc prolongation to be associated with a HR  
23 of 7.3 (95% CI, 4.10-13.05) for 30-day mortality.<sup>37</sup> Combined, these studies support the hypothesis  
24 that patients with a prolonged QTc are at increased risk. Whether or not this is directly linked to  
25 the increased QTc interval or due to other risk factors associated with a prolonged QTc remains  
26 unknown.  
27  
28  
29  
30  
31  
32  
33  
34

35 As demonstrated in our cohort the prevalence of QTc prolongation is strongly associated to the  
36 correction formula. Further, the difference between the HR calculated in the main analysis using  
37 Framingham (HR 3.6; CI 95%, 1.0-12.2) versus the sensitivity analysis using Bazett (HR 1.0; 95% CI,  
38 0.2-5.5) is remarkable. We suspect that using the Bazett formula dilutes the association by  
39 including more patients at low risk as a result of overcorrection.  
40  
41  
42  
43  
44

45 Despite the use of a propensity score model adjusting for several covariates, we cannot exclude  
46 residual confounding. From a clinical point of view, this means that the patients with a prolonged  
47 QTc probably need special care and attention. However, the needed care is not necessarily limited  
48 to telemetry and increased cardiac awareness. Of note, a ventricular arrhythmia with fatal  
49 outcome caused by drug-induced QTc prolongation, would be expected to happen within a  
50 relatively short time-interval after exposure. This was not the case in our study with the first event  
51  
52  
53  
54  
55  
56  
57  
58  
59  
60

1  
2  
3  
4 occurring three days after contact (see Figure 2). In addition, a QTc interval threshold for  
5 identification of patients in need of cardiac telemetry is not well-established. Unfortunately, our  
6 cohort was too small to do further subdivisions of the QTc interval.  
7

8  
9 Ventricular arrhythmias, especially torsades de pointes, are feared consequences of QT  
10 prolongation and may be the cause of death in some poisonings.<sup>38,39</sup> However, as torsades de  
11 pointes is a rare condition,<sup>38,39</sup> it is unlikely to have influenced our results.  
12  
13

14 In this cohort of patients with suspected poisoning 69.2% received a discharge diagnose of  
15 poisoning. This is in contrast to results from a previous Danish study, which found an agreement of  
16 79% for suspected poisoning on arrival and a discharge diagnose of poisoning.<sup>17</sup> In our cohort, only  
17 those who had an ECG recorded were included, and several common poisonings, e.g. alcohol  
18 intoxication, are usually not followed by ECG recording.  
19  
20

21  
22 QTc prolongation was most frequent in the group of poisoning labeled “others” (Table 2). In this  
23 group, the ICD-10 code T50.9 for unspecified poisonings was given to the majority of the patients.  
24 These patients might have been too sick to tell about their poisoning or perhaps denied to do so.  
25 This reflects a common clinical problem in the ED, and indicates that a specific poisoning diagnosis  
26 can be difficult to establish. Further, lack of precision in coding procedure may contribute to  
27  
28  
29  
30  
31  
32  
33  
34  
35  
36  
37  
38  
39  
40  
41  
42  
43  
44  
45  
46  
47  
48  
49  
50  
51  
52  
53  
54  
55  
56  
57  
58  
59  
60

56  
57  
58  
59  
60  
61  
62  
63  
64  
65  
66  
67  
68  
69  
70  
71  
72  
73  
74  
75  
76  
77  
78  
79  
80  
81  
82  
83  
84  
85  
86  
87  
88  
89  
90  
91  
92  
93  
94  
95  
96  
97  
98  
99  
100  
101  
102  
103  
104  
105  
106  
107  
108  
109  
110  
111  
112  
113  
114  
115  
116  
117  
118  
119  
120  
121  
122  
123  
124  
125  
126  
127  
128  
129  
130  
131  
132  
133  
134  
135  
136  
137  
138  
139  
140  
141  
142  
143  
144  
145  
146  
147  
148  
149  
150  
151  
152  
153  
154  
155  
156  
157  
158  
159  
160  
161  
162  
163  
164  
165  
166  
167  
168  
169  
170  
171  
172  
173  
174  
175  
176  
177  
178  
179  
180  
181  
182  
183  
184  
185  
186  
187  
188  
189  
190  
191  
192  
193  
194  
195  
196  
197  
198  
199  
200  
201  
202  
203  
204  
205  
206  
207  
208  
209  
210  
211  
212  
213  
214  
215  
216  
217  
218  
219  
220  
221  
222  
223  
224  
225  
226  
227  
228  
229  
230  
231  
232  
233  
234  
235  
236  
237  
238  
239  
240  
241  
242  
243  
244  
245  
246  
247  
248  
249  
250  
251  
252  
253  
254  
255  
256  
257  
258  
259  
260  
261  
262  
263  
264  
265  
266  
267  
268  
269  
270  
271  
272  
273  
274  
275  
276  
277  
278  
279  
280  
281  
282  
283  
284  
285  
286  
287  
288  
289  
290  
291  
292  
293  
294  
295  
296  
297  
298  
299  
300  
301  
302  
303  
304  
305  
306  
307  
308  
309  
310  
311  
312  
313  
314  
315  
316  
317  
318  
319  
320  
321  
322  
323  
324  
325  
326  
327  
328  
329  
330  
331  
332  
333  
334  
335  
336  
337  
338  
339  
340  
341  
342  
343  
344  
345  
346  
347  
348  
349  
350  
351  
352  
353  
354  
355  
356  
357  
358  
359  
360  
361  
362  
363  
364  
365  
366  
367  
368  
369  
370  
371  
372  
373  
374  
375  
376  
377  
378  
379  
380  
381  
382  
383  
384  
385  
386  
387  
388  
389  
390  
391  
392  
393  
394  
395  
396  
397  
398  
399  
400  
401  
402  
403  
404  
405  
406  
407  
408  
409  
410  
411  
412  
413  
414  
415  
416  
417  
418  
419  
420  
421  
422  
423  
424  
425  
426  
427  
428  
429  
430  
431  
432  
433  
434  
435  
436  
437  
438  
439  
440  
441  
442  
443  
444  
445  
446  
447  
448  
449  
450  
451  
452  
453  
454  
455  
456  
457  
458  
459  
460  
461  
462  
463  
464  
465  
466  
467  
468  
469  
470  
471  
472  
473  
474  
475  
476  
477  
478  
479  
480  
481  
482  
483  
484  
485  
486  
487  
488  
489  
490  
491  
492  
493  
494  
495  
496  
497  
498  
499  
500  
501  
502  
503  
504  
505  
506  
507  
508  
509  
510  
511  
512  
513  
514  
515  
516  
517  
518  
519  
520  
521  
522  
523  
524  
525  
526  
527  
528  
529  
530  
531  
532  
533  
534  
535  
536  
537  
538  
539  
540  
541  
542  
543  
544  
545  
546  
547  
548  
549  
550  
551  
552  
553  
554  
555  
556  
557  
558  
559  
560  
561  
562  
563  
564  
565  
566  
567  
568  
569  
570  
571  
572  
573  
574  
575  
576  
577  
578  
579  
580  
581  
582  
583  
584  
585  
586  
587  
588  
589  
590  
591  
592  
593  
594  
595  
596  
597  
598  
599  
600  
601  
602  
603  
604  
605  
606  
607  
608  
609  
610  
611  
612  
613  
614  
615  
616  
617  
618  
619  
620  
621  
622  
623  
624  
625  
626  
627  
628  
629  
630  
631  
632  
633  
634  
635  
636  
637  
638  
639  
640  
641  
642  
643  
644  
645  
646  
647  
648  
649  
650  
651  
652  
653  
654  
655  
656  
657  
658  
659  
660  
661  
662  
663  
664  
665  
666  
667  
668  
669  
670  
671  
672  
673  
674  
675  
676  
677  
678  
679  
680  
681  
682  
683  
684  
685  
686  
687  
688  
689  
690  
691  
692  
693  
694  
695  
696  
697  
698  
699  
700  
701  
702  
703  
704  
705  
706  
707  
708  
709  
710  
711  
712  
713  
714  
715  
716  
717  
718  
719  
720  
721  
722  
723  
724  
725  
726  
727  
728  
729  
730  
731  
732  
733  
734  
735  
736  
737  
738  
739  
740  
741  
742  
743  
744  
745  
746  
747  
748  
749  
750  
751  
752  
753  
754  
755  
756  
757  
758  
759  
760  
761  
762  
763  
764  
765  
766  
767  
768  
769  
770  
771  
772  
773  
774  
775  
776  
777  
778  
779  
780  
781  
782  
783  
784  
785  
786  
787  
788  
789  
790  
791  
792  
793  
794  
795  
796  
797  
798  
799  
800  
801  
802  
803  
804  
805  
806  
807  
808  
809  
810  
811  
812  
813  
814  
815  
816  
817  
818  
819  
820  
821  
822  
823  
824  
825  
826  
827  
828  
829  
830  
831  
832  
833  
834  
835  
836  
837  
838  
839  
840  
841  
842  
843  
844  
845  
846  
847  
848  
849  
850  
851  
852  
853  
854  
855  
856  
857  
858  
859  
860  
861  
862  
863  
864  
865  
866  
867  
868  
869  
870  
871  
872  
873  
874  
875  
876  
877  
878  
879  
880  
881  
882  
883  
884  
885  
886  
887  
888  
889  
890  
891  
892  
893  
894  
895  
896  
897  
898  
899  
900  
901  
902  
903  
904  
905  
906  
907  
908  
909  
910  
911  
912  
913  
914  
915  
916  
917  
918  
919  
920  
921  
922  
923  
924  
925  
926  
927  
928  
929  
930  
931  
932  
933  
934  
935  
936  
937  
938  
939  
940  
941  
942  
943  
944  
945  
946  
947  
948  
949  
950  
951  
952  
953  
954  
955  
956  
957  
958  
959  
960  
961  
962  
963  
964  
965  
966  
967  
968  
969  
970  
971  
972  
973  
974  
975  
976  
977  
978  
979  
980  
981  
982  
983  
984  
985  
986  
987  
988  
989  
990  
991  
992  
993  
994  
995  
996  
997  
998  
999  
1000

### 41 **Founding**

42  
43 This study was funded by an independent grant from The Research Foundation of Odense  
44 University Hospital. The funding sources had no role in the design of the study, data analysis or  
45 interpretation of the results.  
46  
47  
48  
49

### 50 **Competing interests**

51  
52 ATL was supported by an unrestricted grant to the University of Southern Denmark from  
53 TrygFoundation. All other authors declare no conflicts of interest.  
54  
55  
56  
57  
58  
59  
60

**Author contributions**

CSH designed the study, interpreted the results and drafted the paper. AP analyzed the data. CSH, AP, ATL, HKJ, UE, MB, and JLF conceived the study. ATL, AP and HKJ provided statistical advice and advice on the study design. AP, ATL, HKJ, UE, MB, and JLF critically reviewed the paper, assisted with interpretation of the results, and have approved the final edition. CSH takes responsibility for the final paper.

**Data sharing statement**

Due to Danish law regarding personal data we are not allowed to share data in public dataset. However, we welcome every researcher who wants to repeat the analysis or do new analysis in the dataset. Please contact professor Annmarie Lassen (Annmarie.Lassen@rsyd.dk) and she will help the researcher to get access to the data.

## REFERENCES

1. Carter-Storch R, Olsen UF, Mogensen CB. Admissions to emergency department may be classified into specific complaint categories. *Dan Med J*. 2014;61(3):A4802.
2. Safwenberg U, Terént A, Lind L. Differences in Long-term Mortality for Different Emergency Department Presenting Complaints. *Acad Emerg Med*. 2008;15(1):9-16.
3. Woosley RL, Romero KA. QTdrugs List. AZCERT, Inc. <https://www.crediblemeds.org/new-drug-list/>. Updated August 10, 2016. Accessed December 17, 2015.
4. de Bruyne MC, Hoes AW, Kors JA, et al. Prolonged QT interval predicts cardiac and all-cause mortality in the elderly. The Rotterdam Study. *Eur Heart J*. 1999;20(4):278-284.
5. Straus SM, Kors JA, De Bruin ML, et al. Prolonged QTc interval and risk of sudden cardiac death in a population of older adults. *J Am Coll Cardiol*. 2006;47(2):362-367.
6. Robbins J, Nelson JC, Rautaharju PM, et al. The association between the length of the QT interval and mortality in the Cardiovascular Health Study. *Am J Med*. 2003;115(9):689-694.
7. Zhang Y, Post WS, Blasco-Colmenares E, et al. Electrocardiographic QT interval and mortality: a meta-analysis. *Epidemiology*. 2011;22(5):660-670.
8. Nielsen JB, Graff C, Rasmussen PV, et al. Risk prediction of cardiovascular death based on the QTc interval: evaluating age and gender differences in a large primary care population. *Eur Heart J*. 2014;35(20):1335-1344.
9. Panoulas VF, Toms TE, Douglas KM, et al. Prolonged QTc interval predicts all-cause mortality in patients with rheumatoid arthritis: an association driven by high inflammatory burden. *Rheumatology (Oxford)*. 2014;53(1):131-137.
10. Straus SM, Sturkenboom MC, Bleumink GS, et al. Non-cardiac QTc-prolonging drugs and the risk of sudden cardiac death. *Eur Heart J*. 2005;26(19):2007-2012.
11. Ray WA, Chung CP, Murray KT, et al. Atypical antipsychotic drugs and the risk of sudden cardiac death. *N Engl J Med*. 2009;360(3):225-235.
12. Ray WA, Meredith S, Thapa PB, et al. Cyclic antidepressants and the risk of sudden cardiac death. *Clin Pharmacol Ther*. 2004;75(3):234-241.
13. Ray WA, Murray KT, Hall K, et al. Azithromycin and the risk of cardiovascular death. *N Engl J Med*. 2012;366(20):1881-1890.
14. Drew BJ, Califf RM, Funk M, et al. Practice standards for electrocardiographic monitoring in hospital settings: an American Heart Association scientific statement from the Councils on Cardiovascular Nursing, Clinical Cardiology, and Cardiovascular Disease in the Young: endorsed by the International Society of Computerized Electrocardiology and the American Association of Critical-Care Nurses. *Circulation*. 2004;110(17):2721-2746.
15. Manini AF, Nelson LS, Skolnick AH, et al. Electrocardiographic predictors of adverse cardiovascular events in suspected poisoning. *J Med Toxicol*. 2010;6(2):106-115.
16. Manini AF, Hoffman RS, Stimmel B, et al. Clinical risk factors for in-hospital adverse cardiovascular events after acute drug overdose. *Acad Emerg Med*. 2015;22(5):499-507.
17. Norgaard B, Mogensen CB, Teglbjaerg LS, et al. Diagnostic packages can be assigned accurately in emergency departments. A multi-centre cohort study. *Dan Med J*. 2016;63(6):A5240.
18. Schmidt M, Schmidt SA, Sandegaard JL, et al. The Danish National Patient Registry: a review of content, data quality, and research potential. *Clin Epidemiol*. 2015;7:449-490.
19. Pottegard A, Schmidt SA, Wallach-Kildemoes H, et al. Data Resource Profile: The Danish National Prescription Registry. *Int J Epidemiol*. 2016.
20. Astrand B, Hovstadius B, Antonov K, et al. The Swedish National Pharmacy Register. *Stud Health Technol Inform*. 2007;129(Pt 1):345-349.
21. Schmidt M, Pedersen L, Sorensen HT. The Danish Civil Registration System as a tool in epidemiology. *Eur J Epidemiol*. 2014;29(8):541-549.

- 1  
2  
3  
4 22. Ludvigsson JF, Otterblad-Olausson P, Pettersson BU, et al. The Swedish personal identity number: possibilities and pitfalls in healthcare and medical research. *Eur J Epidemiol*. 2009;24(11):659-667.
- 5  
6 23. *Marquette™ 12SL™ ECG Analysis Program. Physician's Guide. 2056246-002 Revision B*. Milwaukee, WI: GE Healthcare; 13 July 2015.
- 7  
8 24. *Läkarhandbok för Phillips DXL-algoritm för EKG. Publikationsnummer 453564149891*. Andover, MA: Phillips Medical Systems; 1 June 2009.
- 9  
10 25. Sagie A, Larson MG, Goldberg RJ, et al. An improved method for adjusting the QT interval for heart rate (the Framingham Heart Study). *Am J Cardiol*. 1992;70(7):797-801.
- 11  
12 26. Rautaharju PM, Surawicz B, Gettes LS, et al. AHA/ACCF/HRS recommendations for the standardization and interpretation of the electrocardiogram: part IV: the ST segment, T and U waves, and the QT interval: a scientific statement from the American Heart Association Electrocardiography and Arrhythmias Committee, Council on Clinical Cardiology; the American College of Cardiology Foundation; and the Heart Rhythm Society: endorsed by the International Society for Computerized Electrocardiology. *Circulation*. 2009;119(10):e241-250.
- 13  
14  
15  
16  
17  
18 27. Sturmer T, Joshi M, Glynn RJ, et al. A review of the application of propensity score methods yielded increasing use, advantages in specific settings, but not substantially different estimates compared with conventional multivariable methods. *J Clin Epidemiol*. 2006;59(5):437-447.
- 19  
20  
21 28. Rassen JA, Shelat AA, Myers J, et al. One-to-many propensity score matching in cohort studies. *Pharmacoepidemiol Drug Saf*. 2012;21 Suppl 2:69-80.
- 22  
23 29. Charlson ME, Pompei P, Ales KL, et al. A new method of classifying prognostic comorbidity in longitudinal studies: development and validation. *J Chronic Dis*. 1987;40(5):373-383.
- 24  
25 30. Quan H, Sundararajan V, Halfon P, et al. Coding algorithms for defining comorbidities in ICD-9-CM and ICD-10 administrative data. *Med Care*. 2005;43(11):1130-1139.
- 26  
27 31. Poluzzi E, Raschi E, Diemberger I, et al. Drug-Induced Arrhythmia: Bridging the Gap Between Pathophysiological Knowledge and Clinical Practice. *Drug Safe*. 2017;40:461-464.
- 28  
29 32. Austin PC. Optimal caliper widths for propensity-score matching when estimating differences in means and differences in proportions in observational studies. *Pharm Stat*. 2011;10(2):150-161.
- 30  
31 33. C. BH. An analysis of time-relations of electrocardiograms. *Heart*. 1920;7:353-370.
- 32  
33 34. Manini AF, Nelson LS, Stimmel B, et al. Incidence of adverse cardiovascular events in adults following drug overdose. *Acad Emerg Med*. 2012;19(7):843-849.
- 34  
35 35. Gunnell D, Ho D, Murray V. Medical management of deliberate drug overdose: a neglected area for suicide prevention? *Emerg Med J*. 2004;21(1):35-38.
- 36  
37 36. Seftchick MW, Adler PH, Hsieh M, et al. The prevalence and factors associated with QTc prolongation among emergency department patients. *Ann Emerg Med*. 2009;54(6):763-768.
- 38  
39 37. Vandenberk B, Vandael E, Robyns T, et al. Which QT Correction Formulae to Use for QT Monitoring? *Journal of the American Heart Association*. 2016;5(6):e003264.
- 40  
41 38. Al-Abri SA, Woodburn C, Olson KR, et al. Ventricular dysrhythmias associated with poisoning and drug overdose: a 10-year review of statewide poison control center data from California. *Am J Cardiovasc Drugs*. 2015;15(1):43-50.
- 42  
43  
44 39. Yap YG, Camm AJ. Drug induced QT prolongation and torsades de pointes. *Heart*. 2003;89(11):1363-1372.
- 45  
46  
47  
48  
49  
50  
51  
52  
53  
54  
55  
56  
57  
58  
59  
60

## Legends for figures

**Figure 1: Flowchart of the study population**

**Figure 2: Kaplan Meier failure estimate**

Abbreviations: QTclong = 0, patients without QTc prolongation; QTclong = 1, patients with QTc prolongation.

For peer review only



1  
2  
3  
4  
5  
6  
7  
8  
9  
10  
11  
12  
13  
14  
15  
16  
17  
18  
19  
20  
21  
22  
23  
24  
25  
26  
27  
28  
29  
30  
31  
32  
33  
34  
35  
36  
37  
38  
39  
40  
41  
42  
43  
44  
45  
46  
47  
48  
49  
50  
51  
52  
53  
54  
55  
56  
57  
58  
59  
60

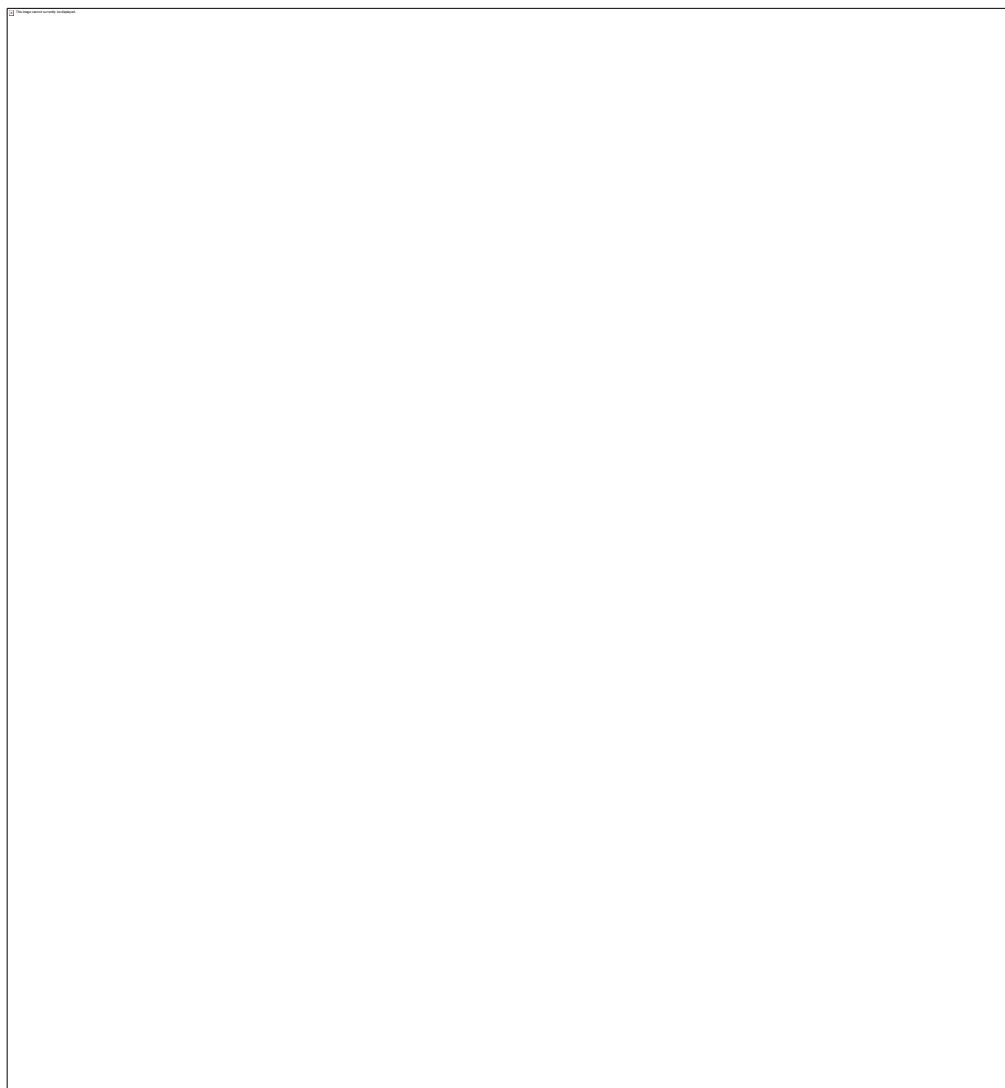

Figure 1: Flowchart of the study population  
203x220mm (300 x 300 DPI)

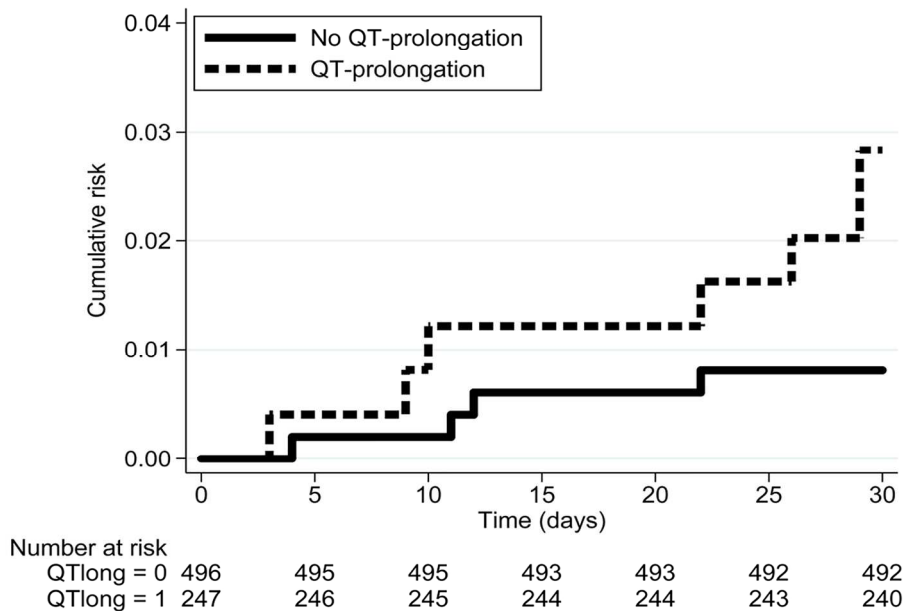

Figure 2: Kaplan Meier failure estimate  
 Abbreviations: QTlong = 0, patients without QTc prolongation; QTlong = 1, patients with QTc prolongation.

View Only

## APPENDIX

### Appendix A – Data sources

In the logistic system in the EDs of the Region of Southern Denmark and the Region of Skåne information regarding triage and presumed diagnoses are shared among the health care personal. The system also provides information on time of arrival to the ED as well as time of discharge. At arrival all patients are registered by main reason for contact. Lund and Helsingborg have 43 somatic contact possibilities, Odense and Esbjerg have 40 contact possibilities. We used these systems to identify patients with suspected poisoning.

From the electronic central ECG databases at the Region of Southern Denmark and the Region of Skåne all ECGs measures were extracted. These databases contain information of all ECGs recorded in any hospital in the respective region.

The Danish National Patient Register was established in 1977. Since 1994 diagnostic information has been recorded in accordance with ICD-10. The content includes information regarding discharge diagnoses from which comorbidities were derived. In Sweden, all health care consultations are recorded in the respective region databases. From the Skåne Healthcare Register, we retrieved information corresponding to information from the Danish National Patient Register. In these regional databases diagnoses from both the primary and secondary health care system are available. Charlson Comorbidity Index was calculated based on data extracted for a 10 year-period ending on the day of contact in the Danish data. From the Swedish database, Charlson Comorbidity Index was calculated for a 2-year period ending on the day of contact to the ED.

The Swedish National Pharmacy Register contains data on all prescriptions dispensed at pharmacies since 2005. Besides date of dispensing, name, amount, and dose of the redeemed medication are accessible from this register. The Danish National Prescription Registry provides similar information of individual-level prescription of medication since 1995. Information of redeemed prescription of QT prolonging drugs (see Appendix c.5) within 90 days before contact was obtained through these registers.

1  
2  
3  
4 The Danish Civil Registration System contains data regarding birth, emigration, and vital status for  
5 the entire populations. Information regarding vital status in Sweden was retrieved from the  
6 Swedish population registry. The Danish Civil Registration System was established in 1968, and by  
7 law all Danish residents have a unique civil registration number of ten digits. Since 1967, all  
8 Swedish residences are assigned a ten-digit personal identity number. These unique numbers  
9 allow complete and accurate linkage between registries on an individual level.  
10  
11  
12  
13

## 14 15 **Appendix B – Supplementary methods**

### 16 *ECG measurements*

17  
18 All ECGs were recorded and stored either in MUSE® Cardiology Information System (GE  
19 Healthcare), or by Philips Diagnostic ECG (Philips). All ECGs in our analysis were 12 lead ECGs.  
20 ECGs recorded in MUSE were later processed using the Marquette 12SL algorithm, which calculate  
21 the QTc interval using the Bazett Formula, the Fridericia Formula, and the Framingham Formula. In  
22 MUSE, the QT interval is measured as a median value from the 12 leads. ECG recorded by Philips  
23 were analyzed by the DXL-algorithm. In this algorithm, the QT interval is measured as a median  
24 value from reliable leads. A lead is defined as reliable if little variation in beat-to-beat variation.  
25 Philips provided QTc intervals corrected by the Bazett Formula and the Fridericia Formula.  
26 To correct for heart rate, we chose the Framingham Formula ( $QT_{C_{Framingham}} = QT + 0.154 (1-RR)$ ).  
27 Because Philips DXL-algorithm does not routinely correct the QT interval using the Framingham  
28 Formula, we calculated the  $QT_{C_{Framingham}}$  ourselves. As we did not include RR intervals in our  
29 analysis, the formula was used in another edition than the original formula. Therefore, we used  
30 following formula for correction in ECGs recorded by Philips:  $QT_{C_{Framingham}} = QT + 154 (1-60/\text{heart}$   
31 rate). The QRS duration was measured as a median value in both algorithms.  
32  
33  
34  
35  
36  
37  
38  
39  
40  
41  
42  
43

44  
45 The Marquette 12SL algorithm defines onsets as the earliest deflection in any lead, and offsets as  
46 the latest deflection in any lead. The QT interval is measured from the earliest detection of  
47 depolarization in any lead to the latest detection of repolarization in any lead. Similarly, the QRS  
48 duration was measured from the earliest onset in any lead to the latest deflection in any lead.  
49 The Philips DXL-algorithm first identifies waveform component and measures every beat in each  
50 lead individually. After the approximate waveform locations are known, onsets and offsets are  
51 defined. Once the onsets and offsets are known, duration of intervals are calculated.  
52  
53  
54  
55  
56  
57  
58  
59  
60

1  
2  
3  
4  
5  
6 In both Denmark and Sweden ECG recording is performed by well-educated health care persons  
7 instructed only to accept ECGs of satisfying quality. Otherwise it is considered a routine to record  
8 another ECG. If multiple ECGs were recorded in a single individual, the first ECG recorded within 4  
9 hours after arrival was included in the analysis.  
10  
11  
12  
13  
14  
15  
16  
17  
18  
19  
20  
21  
22  
23  
24  
25  
26  
27  
28  
29  
30  
31  
32  
33  
34  
35  
36  
37  
38  
39  
40  
41  
42  
43  
44  
45  
46  
47  
48  
49  
50  
51  
52  
53  
54  
55  
56  
57  
58  
59  
60

## Appendix C – Codes and definitions

### C.1

| <b>Codes for cardiac arrest and codes used in identifying patients with cardiac arrest</b> |                                                                                                                                                                                                                                                                                                                                                     |
|--------------------------------------------------------------------------------------------|-----------------------------------------------------------------------------------------------------------------------------------------------------------------------------------------------------------------------------------------------------------------------------------------------------------------------------------------------------|
| ICD-10 codes                                                                               | DI46: Cardiac arrest<br>DI46.0: Cardiac arrest with successful recitation<br>DI46.1: Sudden cardiac death<br>DI46.9: Cardiac arrest unspecified                                                                                                                                                                                                     |
| SKS codes*                                                                                 | <b>Administrative codes</b><br>AVAA07: Sudden cardiac arrest<br>AVAA06: Sudden cardiac arrest<br><br><b>Procedure codes</b><br>ZZ0401: Standby for cardiac arrest<br><br><b>Treatment codes</b><br>BFFA6: Chest compressions<br>BFFA60: External chest compressions<br>BFFA60A: External chest compressions by use of mechanical chest compressions |
| KVÅ-codes**                                                                                | DF012: Chest compressions<br>DF017: Mechanical chest compressions<br>DF028: Cardiopulmonary resuscitation                                                                                                                                                                                                                                           |

\*SKS = Sundhedsvæsenets klassifikations system, available on <http://medinfo.dk/sks/brows.php>, Danish codes.

\*\*KVÅ= Klassifikation av vårdåtgärder, available on

<http://www.socialstyrelsen.se/klassificeringochkoder/atgardskoderkva>, Swedish codes.

### C.2

| <b>Poisoning divided into groups by use of ICD-10 codes</b>              |                                              |
|--------------------------------------------------------------------------|----------------------------------------------|
| <b>Analgesics and drugs of abuse</b>                                     | T39*-T40*, F110*, F120*, F140*, F150*, F160* |
| <b>Psychotropic drugs and drugs affecting the central nervous system</b> | T42*-T44*, F130*, F190*                      |
| <b>Organic and chemical substances, non-medical substances</b>           | T51*-T65*, F100*, F170*, F180*               |
| <b>Others</b>                                                            | T36*-T38*, T41*, T45*-T50*                   |
| <b>Multidrug</b>                                                         | ≥2 of the above mentioned poisoning groups   |

## C.3

| Charlson Comorbidity Index*            |                 |                                                                                                                                                                               |
|----------------------------------------|-----------------|-------------------------------------------------------------------------------------------------------------------------------------------------------------------------------|
| Condition                              | Assigned weight | ICD-10 codes                                                                                                                                                                  |
| Peripheral vascular disease            | 1               | I70.x, I71x, I73.1, I73.8, I73.9, I77.1, I79.0, I79.2, K55.1, K55.8, K55.9, Z95.8, Z95.9                                                                                      |
| Cerebrovascular disease                | 1               | G45.x, G46.x, H34.0, I60.x-I69.x                                                                                                                                              |
| Dementia                               | 1               | F00.x-F03.x, F05.1, G30.x, G31.1                                                                                                                                              |
| Chronic pulmonary disease              | 1               | I27.8, I27.9, J40.x-J47.x, J60.x-J67.x, J68.4, J70.1, J70.3                                                                                                                   |
| Rheumatic disease                      | 1               | M05.x, M06.x, M31.5, M32.x-M34.x, M35.1, M35.3, M36.0                                                                                                                         |
| Peptic ulcer disease                   | 1               | K25.x-K28.x                                                                                                                                                                   |
| Mild liver disease                     | 1               | B18.x, K70.0-K70.3, K70.9, K71.3-K71.5, K71.7, K73.x, K74.x, K76.0, K76.2-K76.4, K76.8, K76.9, Z94.4                                                                          |
| Diabetes without chronic complications | 1               | E10.0, E10.1, E10.6, E10.8, E10.9, E11.0, E11.1, E11.6, E11.8, E11.9, E12.0, E12.1, E12.6, E12.8, E12.9, E13.0, E13.1, E13.6, E13.8, E13.9, E14.0, E14.1, E14.6, E14.8, E14.9 |
| Hemiplegia or paraplegia               | 2               | G04.1, G11.4, G80.1, G80.2, G81.x, G82.x, G83.0-G83.4, G83.9                                                                                                                  |
| Renal disease                          | 2               | I12.0, I13.1, N03.2-N03.7, N05.2- N05.7, N18.x, N19.x, N25.0, Z49.0- Z49.2, Z94.0, Z99.2                                                                                      |
| Diabetes with chronic complications    | 2               | E10.2-E10.5, E10.7, E11.2-E11.5, E11.7, E12.2-E12.5, E12.7, E13.2- E13.5, E13.7, E14.2-E14.5, E14.7                                                                           |
| Cancer                                 | 2               | C00.x-C26.x, C30.x-C34.x, C37.x- C41.x, C43.x, C45.x-C58.x, C60.x- C76.x, C81.x-C85.x, C88.x, C90.x-C97.x                                                                     |
| Metastatic cancer                      | 3               | C77.x-C80.x                                                                                                                                                                   |
| Moderate or severe liver disease       | 3               | I85.0, I85.9, I86.4, I98.2, K70.4, K71.1, K72.1, K72.9, K76.5, K76.6, K76.7                                                                                                   |
| AIDS/HIV**                             | 6               | B20.x-B22.x, B24.x                                                                                                                                                            |

\*Diagnostic codes for myocardial infarction and heart failure are not included in the index, but are included in this study as covariates.

\*\* AIDS = acquired immunodeficiency syndrome, HIV = human immunodeficiency virus

## C.4

| Variables from Charlson Comorbidity Index, included separately in the analysis |                                                                            |
|--------------------------------------------------------------------------------|----------------------------------------------------------------------------|
| Myocardial infarction                                                          | I21.x, I22.x, I25.2                                                        |
| Congestive heart failure                                                       | I09.9, I11.0, I13.0, I13.2, I25.5, I42.0, I42.5-I42.9, I43.x, I50.x, P29.0 |

## C.5

| List of drugs associated with QT prolongation and risk of TdP* |                                                                                                                                                                                                                                                         |
|----------------------------------------------------------------|---------------------------------------------------------------------------------------------------------------------------------------------------------------------------------------------------------------------------------------------------------|
| Drug category                                                  | ATC-codes**                                                                                                                                                                                                                                             |
| Alimentary tract and metabolism                                | Domperidone (A03FA03), Granisetron (A04AA02), Metoclopramide (A03FA01), Ondansetron (A04AA01), Pantoprazole (A02BC02)                                                                                                                                   |
| Cardiovascular system                                          | Amiodarone (C01BD01), Dronedaron (C01BD07), Flecainide (C01BC04), Furosemide (C03CA01, C03EB01), Hydrochlorothiazide (C03EA01, C09DA01, C09DA06, C09DA04, C09BA02), Indapamide (C03BA11), Isradipine (C08CA03), Ivabradine (C01EB17), Sotalol (C07AA07) |
| Genito urinary system and sex hormones                         | Alfuzosin (G04CA01), Mifepristone (G03XB01), Mirabegron (G04BD12), Solifenacin (G04BD08, G04CA53), Tolterodine (G04BD07), Vardenafil (G04BE09)                                                                                                          |

|                                                                        |                                                                                                                                                                                                                                                                                                                                                                                                                                                                                                                                                                                                                                                                                                                                                                                                                                                                                                                 |
|------------------------------------------------------------------------|-----------------------------------------------------------------------------------------------------------------------------------------------------------------------------------------------------------------------------------------------------------------------------------------------------------------------------------------------------------------------------------------------------------------------------------------------------------------------------------------------------------------------------------------------------------------------------------------------------------------------------------------------------------------------------------------------------------------------------------------------------------------------------------------------------------------------------------------------------------------------------------------------------------------|
| <b>Systemic hormonal preparations, excl. sex hormones and insulins</b> | Oxytocin (H01BB02), Pasireotide (H01CB05)                                                                                                                                                                                                                                                                                                                                                                                                                                                                                                                                                                                                                                                                                                                                                                                                                                                                       |
| <b>Anti-infectives for systemic use</b>                                | Atazanavir (J05AR15), Azithromycin (J01FA10), Bedaquiline (J04AK05), Ciprofloxacin (J01MA02), Clarithromycin (J01FA09), Erythromycin (J01FA01), Fluconazole (J02AC01), Fosfarnet (J05AD), Itraconazole (J02AC02), Ketoconazole (J02AB02), Metronidazole (J01XD01), Moxifloxacin (J01MA14), Posaconazole (J02AC04), Rilpivirine (J05AG05), Ritonavir (J05AE03), Roxithromycin (J01FA06), Saquinavir (J05AE01), Voriconazole (J02AC03)                                                                                                                                                                                                                                                                                                                                                                                                                                                                            |
| <b>Antineoplastic and immunomodulatory agents</b>                      | Anagrelide (L01XX35), Bortezomib (L01XX32), Bosutinib (L01XE14), Ceritinib (L01XE28), Crizotinib (L01XE16), Dabrafenib (L01XE23), Dasatinib (L01XE06), Degarelix (L02BX02), Eribulin mesylate (L01XX41), Fingolimod (L04AA27), Lapatinib (L01XE07), Leuprolide (L02AE02), Nilotinib (L01XE08), Oxaliplatin (L01XA03), Panobinostat (L01XX42), Pazopanib (L01XE11), Sorafenib (L01XE05), Sunitinib (L01XE04), Tacrolimus (L04AD02), Tamoxifen (L02BA01), Vandetanib (L01XE12), Vemurafenib (L01XE15)                                                                                                                                                                                                                                                                                                                                                                                                             |
| <b>Musculo-skeletal system</b>                                         | Tizanidine (M03BX02)                                                                                                                                                                                                                                                                                                                                                                                                                                                                                                                                                                                                                                                                                                                                                                                                                                                                                            |
| <b>Nervous system</b>                                                  | Amantadine (N04BB01), Amisulpride (N05AL05), Amitriptyline (N06AA09), Apomorphine (N04BC07), Aripiprazole (N05AX12), Asenapine (N05AH05), Atomoxetine (N06BA09), Citalopram (N06AB04), Clomipramine (N06AA04), Clozapine (N05AH02), Dexmedetomidin (N05CM18), Doxepin (N06AA12), Droperidol (N05AD08), Escitalopram (N06AB10), Fluoxetine (N06AB03), Galantamine (N06DA04), Haloperidol (N05AD01), Hydroxyzine (N05BB01), Imipramine (N06AA02), Levomepromazine (N05AA02), Lithium (N05AN01), Methadone (N07BC02), Mirtazapine (N06AX11), Nortriptyline (N06AA10), Olanzapine (N05AH03), Paliperidone (N05AX13), Paroxetine (N06AB05), Pimozide (N05AG02), Pipamperone (N05AD05), Propofol (N01AX10), Quetiapine (N05H04), Risperidone (N05AX08), Sertindole (N05AE03), Sertraline (N06AB06), Sevoflurane (N01AB08), Sulpiride (N05AL01), Tetrabenazine (N07XX06), Venlafaxine (N06AX16), Ziprasidone (N05AE04) |
| <b>Antiparasitic products, insecticides and repellents</b>             | Chloroquine (P01BC02), Hydroxychloroquine (P01BA02), Metronidazole (P01AB01), Pentamidine (P01CX01), Quinine sulfate (P01BC01)                                                                                                                                                                                                                                                                                                                                                                                                                                                                                                                                                                                                                                                                                                                                                                                  |
| <b>Respiratory system</b>                                              | Diphenhydramine (R06AA02), Promethazine (R06AD02)                                                                                                                                                                                                                                                                                                                                                                                                                                                                                                                                                                                                                                                                                                                                                                                                                                                               |
| <b>Various</b>                                                         | Perflutren lipid microspheres (V08DA01)                                                                                                                                                                                                                                                                                                                                                                                                                                                                                                                                                                                                                                                                                                                                                                                                                                                                         |

\*From QTDrug list, <https://crediblemeds.org/>, version December 17, 2015. Only drugs available in Denmark are included at our list. The list includes drugs with known risk of TdP, possible risk of TdP, and conditional risk of TdP.

\*\*ATC = Anatomical Therapeutic Chemical



## Appendix D – Supplementary results

Results from stratified analysis. Although further strata than shown in this table were preplanned (e.g. stratification on all poisoning groups and age), we only stratified when possible due to a small number of events.

|                            | QTc prolongation<br>QTc ≥450 ms, men<br>QTc ≥460 ms, women | Normal QTc interval<br><440 ms, men and women | HR*<br>(95% CI) |
|----------------------------|------------------------------------------------------------|-----------------------------------------------|-----------------|
|                            | Events (n)**                                               | Events (n)**                                  |                 |
| <b>Suspected poisoning</b> |                                                            |                                               |                 |
| Total                      | 8 (248)                                                    | n<5 (496)                                     | 3.6 (1.0-12.2)  |
| Male                       | n<5                                                        | n<5                                           | 2.7 (0.5-16.3)  |
| Female                     | n<5                                                        | n<5                                           | 4.4 (0.8-24.3)  |
| Age ≥50 years              | 6 (131)                                                    | n<5                                           | 2.7 (0.7-9.9)   |
| Odense or Esbjerg          | n<5                                                        | n<5                                           | 5.8 (0.6-57.4)  |
| Lund                       | n<5                                                        | n<5                                           | 1.7 (0.2-12.2)  |
| Helsingborg                | n<5                                                        | n<5                                           | 4.4 (0.4-49.2)  |
| <b>Confirmed poisoning</b> |                                                            |                                               |                 |
| Total                      | 6 (151)                                                    | n<5                                           | 10.5 (1.2-90.0) |
| Psychotropic drugs         | n<5                                                        | n<5                                           | 2.0 (0.1-32.5)  |

Abbreviations: HR; hazard ratio, CI; confidence interval.

\*Hazard ratio from Cox regression.

\*\*If the number of events in the analysis was less than 5 (marked by n<5), the number of patients in the strata is not shown.

## STROBE Statement—checklist of items that should be included in reports of observational studies

|                              | Item No | Recommendation                                                                                                                                                                                                                                                                                                                                                                                                                                                                                |
|------------------------------|---------|-----------------------------------------------------------------------------------------------------------------------------------------------------------------------------------------------------------------------------------------------------------------------------------------------------------------------------------------------------------------------------------------------------------------------------------------------------------------------------------------------|
| <b>Title and abstract</b>    | 1       | (a) Indicate the study's design with a commonly used term in the title or the abstract<br><b>Page 1 and 2</b>                                                                                                                                                                                                                                                                                                                                                                                 |
|                              |         | (b) Provide in the abstract an informative and balanced summary of what was done and what was found<br><b>Page 2</b>                                                                                                                                                                                                                                                                                                                                                                          |
| <b>Introduction</b>          |         |                                                                                                                                                                                                                                                                                                                                                                                                                                                                                               |
| Background/rationale         | 2       | Explain the scientific background and rationale for the investigation being reported<br><b>Page 3</b>                                                                                                                                                                                                                                                                                                                                                                                         |
| Objectives                   | 3       | State specific objectives, including any prespecified hypotheses<br><b>Page 3</b>                                                                                                                                                                                                                                                                                                                                                                                                             |
| <b>Methods</b>               |         |                                                                                                                                                                                                                                                                                                                                                                                                                                                                                               |
| Study design                 | 4       | Present key elements of study design early in the paper<br><b>Page 3</b>                                                                                                                                                                                                                                                                                                                                                                                                                      |
| Setting                      | 5       | Describe the setting, locations, and relevant dates, including periods of recruitment, exposure, follow-up, and data collection<br><b>Page 3-5</b>                                                                                                                                                                                                                                                                                                                                            |
| Participants                 | 6       | (a) <i>Cohort study</i> —Give the eligibility criteria, and the sources and methods of selection of participants. Describe methods of follow-up<br><b>Page 4 and 5</b><br><i>Case-control study</i> —Give the eligibility criteria, and the sources and methods of case ascertainment and control selection. Give the rationale for the choice of cases and controls<br><i>Cross-sectional study</i> —Give the eligibility criteria, and the sources and methods of selection of participants |
|                              |         | (b) <i>Cohort study</i> —For matched studies, give matching criteria and number of exposed and unexposed<br><b>Page 5</b> (As we did a propensity score analysis the number of exposed and unexposed are outlined in the results because it cannot be provided before the analysis)<br><i>Case-control study</i> —For matched studies, give matching criteria and the number of controls per case                                                                                             |
| Variables                    | 7       | Clearly define all outcomes, exposures, predictors, potential confounders, and effect modifiers. Give diagnostic criteria, if applicable<br><b>Page 4, 5, and Appendix B and C</b>                                                                                                                                                                                                                                                                                                            |
| Data sources/<br>measurement | 8*      | For each variable of interest, give sources of data and details of methods of assessment (measurement). Describe comparability of assessment methods if there is more than one group<br><b>Page 4 and Appendix A, B, and C</b>                                                                                                                                                                                                                                                                |
| Bias                         | 9       | Describe any efforts to address potential sources of bias<br><b>Page 6</b>                                                                                                                                                                                                                                                                                                                                                                                                                    |
| Study size                   | 10      | Explain how the study size was arrived at<br><b>Page 4 and figure 1</b>                                                                                                                                                                                                                                                                                                                                                                                                                       |
| Quantitative variables       | 11      | Explain how quantitative variables were handled in the analyses. If applicable,                                                                                                                                                                                                                                                                                                                                                                                                               |

1  
2  
3  
4  
5  
6  
7  
8  
9  
10  
11  
12  
13  
14  
15  
16  
17  
18  
19  
20  
21  
22  
23  
24  
25  
26  
27  
28  
29  
30  
31  
32  
33  
34  
35  
36  
37  
38  
39  
40  
41  
42  
43  
44  
45  
46  
47  
48  
49  
50  
51  
52  
53  
54  
55  
56  
57  
58  
59  
60

describe which groupings were chosen and why

**Page 5**

Statistical methods

12

(a) Describe all statistical methods, including those used to control for confounding

**Page 5 and 6**

(b) Describe any methods used to examine subgroups and interactions

**Page 5 and 6**

(c) Explain how missing data were addressed

**No missing data.**

(d) *Cohort study*—If applicable, explain how loss to follow-up was addressed

**No loss to follow-up.**

*Case-control study*—If applicable, explain how matching of cases and controls was addressed

*Cross-sectional study*—If applicable, describe analytical methods taking account of sampling strategy

(e) Describe any sensitivity analyses

**Page 6**

Continued on next page

## Results

|                   |     |                                                                                                                                                                                                                                                                                                       |
|-------------------|-----|-------------------------------------------------------------------------------------------------------------------------------------------------------------------------------------------------------------------------------------------------------------------------------------------------------|
| Participants      | 13* | (a) Report numbers of individuals at each stage of study—eg numbers potentially eligible, examined for eligibility, confirmed eligible, included in the study, completing follow-up, and analysed<br><b>Page 6</b>                                                                                    |
|                   |     | (b) Give reasons for non-participation at each stage<br><b>Page 6</b>                                                                                                                                                                                                                                 |
|                   |     | (c) Consider use of a flow diagram<br><b>Figure 1</b>                                                                                                                                                                                                                                                 |
| Descriptive data  | 14* | (a) Give characteristics of study participants (eg demographic, clinical, social) and information on exposures and potential confounders<br><b>Page 6 and 7, including table 1</b>                                                                                                                    |
|                   |     | (b) Indicate number of participants with missing data for each variable of interest<br><b>None missing</b>                                                                                                                                                                                            |
|                   |     | (c) <i>Cohort study</i> —Summarise follow-up time (eg, average and total amount)<br><b>Page 8</b>                                                                                                                                                                                                     |
| Outcome data      | 15* | <i>Cohort study</i> —Report numbers of outcome events or summary measures over time<br><b>Page 8 and table 3</b>                                                                                                                                                                                      |
|                   |     | <i>Case-control study</i> —Report numbers in each exposure category, or summary measures of exposure                                                                                                                                                                                                  |
|                   |     | <i>Cross-sectional study</i> —Report numbers of outcome events or summary measures                                                                                                                                                                                                                    |
| Main results      | 16  | (a) Give unadjusted estimates and, if applicable, confounder-adjusted estimates and their precision (eg, 95% confidence interval). Make clear which confounders were adjusted for and why they were included<br><b>Page 7 and 8 including table 3</b>                                                 |
|                   |     | (b) Report category boundaries when continuous variables were categorized<br><b>Page 5</b>                                                                                                                                                                                                            |
|                   |     | (c) If relevant, consider translating estimates of relative risk into absolute risk for a meaningful time period<br><b>Page 8</b>                                                                                                                                                                     |
| Other analyses    | 17  | Report other analyses done—eg analyses of subgroups and interactions, and sensitivity analyses<br>The prevalence of QTc prolongation in relation to specific subgroups: <b>page 7 and table 2.</b><br><b>Appendix D</b> includes a stratified analysis.<br>Sensitivity analysis: <b>page 8 and 9.</b> |
| <b>Discussion</b> |     |                                                                                                                                                                                                                                                                                                       |
| Key results       | 18  | Summarise key results with reference to study objectives<br><b>Page 9</b>                                                                                                                                                                                                                             |
| Limitations       | 19  | Discuss limitations of the study, taking into account sources of potential bias or imprecision. Discuss both direction and magnitude of any potential bias<br><b>Page 9 and 10.</b>                                                                                                                   |
| Interpretation    | 20  | Give a cautious overall interpretation of results considering objectives, limitations, multiplicity of analyses, results from similar studies, and other relevant evidence<br><b>Page 10 and 11.</b>                                                                                                  |
| Generalisability  | 21  | Discuss the generalisability (external validity) of the study results<br><b>Page 9 and 10.</b>                                                                                                                                                                                                        |

1  
2  
3  
4  
5  
6  
7  
8  
9  
10  
11  
12  
13  
14  
15  
16  
17  
18  
19  
20  
21  
22  
23  
24  
25  
26  
27  
28  
29  
30  
31  
32  
33  
34  
35  
36  
37  
38  
39  
40  
41  
42  
43  
44  
45  
46  
47  
48  
49  
50  
51  
52  
53  
54  
55  
56  
57  
58  
59  
60**Other information**

---

Funding 22 Give the source of funding and the role of the funders for the present study and, if applicable, for the original study on which the present article is based

**Page 12**

\*Give information separately for cases and controls in case-control studies and, if applicable, for exposed and unexposed groups in cohort and cross-sectional studies.

**Note:** An Explanation and Elaboration article discusses each checklist item and gives methodological background and published examples of transparent reporting. The STROBE checklist is best used in conjunction with this article (freely available on the Web sites of PLoS Medicine at <http://www.plosmedicine.org/>, Annals of Internal Medicine at <http://www.annals.org/>, and Epidemiology at <http://www.epidem.com/>). Information on the STROBE Initiative is available at [www.strobe-statement.org](http://www.strobe-statement.org).
